# Supplementary material for: Design, synthesis, biological evaluation, and in silico studies of novel N-substituted-2-(3,4,5-trimethoxyphenyl)-1H-benzo[d]imidazole-6-carboxamides as promising anticancer agents
Source: Royal Society of Chemistry journal article supplement (doi:10.1039/d4ra04492d), 2024-01-01
Supplement: d4ra04492d1.pdf [file d4ra04492d1.pdf]

**Design, synthesis, biological evaluation, and *in silico* studies of novel  
*N*-substituted-2-(3,4,5-trimethoxyphenyl)-1*H*-benzo[*d*]imidazole-6-  
carboxamides as promising anticancer agents**

**Supplementary data**

**Figure S3.** The <sup>1</sup>H-NMR spectrum of **5a**.

**Figure S4.** The <sup>13</sup>C-NMR spectrum of **5a**.

**Figure S5.** The <sup>1</sup>H-NMR spectrum of **5b**.

**Figure S6.** The <sup>13</sup>C-NMR spectrum of **5b**.

**Figure S7.** The <sup>1</sup>H-NMR spectrum of **5c**.

**Figure S8.** The <sup>13</sup>C-NMR spectrum of **5c**.

**Figure S9.** The <sup>1</sup>H-NMR spectrum of **5d**.

**Figure S10.** The <sup>13</sup>C-NMR spectrum of **5d**.

**Figure S11.** The <sup>1</sup>H-NMR spectrum of **5e**.

**Figure S12.** The <sup>13</sup>C-NMR spectrum of **5e**.

**Figure S13.** The <sup>1</sup>H-NMR spectrum of **5f**.

**Figure S14.** The <sup>13</sup>C-NMR spectrum of **5f**.

**Figure S15.** The <sup>1</sup>H-NMR spectrum of **5g**.

**Figure S16.** The <sup>13</sup>C-NMR spectrum of **5g**.

**Figure S17.** The <sup>1</sup>H-NMR spectrum of **5h**.

**Figure S18.** The <sup>13</sup>C-NMR spectrum of **5h**.

**Figure S19.** The <sup>1</sup>H-NMR spectrum of **5i**.

**Figure S20.** The <sup>13</sup>C-NMR spectrum of **5i**.

**Figure S21.** The <sup>1</sup>H-NMR spectrum of **5j**.

**Figure S22.** The <sup>13</sup>C-NMR spectrum of **5j**.

**Figure S23.** The <sup>1</sup>H-NMR spectrum of **5k**.

**Figure S24.** The <sup>13</sup>C-NMR spectrum of **5k**.

**Figure S25.** The <sup>1</sup>H-NMR spectrum of **5l**.

**Figure S26.** The <sup>13</sup>C-NMR spectrum of **5l**.

**Figure S27.** The <sup>1</sup>H-NMR spectrum of **5m**.

**Figure S28.** The <sup>13</sup>C-NMR spectrum of **5m**.

**Figure S29.** The <sup>1</sup>H-NMR spectrum of **5n**.

**Figure S30.** The <sup>13</sup>C-NMR spectrum of **5n**.

**Figure S31.** The  $^1\text{H}$ -NMR spectrum of **5o**.

**Figure S32.** The  $^{13}\text{C}$ -NMR spectrum of **5o**.

**Figure S33.** Cytotoxicity of **5a-o**, doxorubicin, cisplatin, and etoposide against A549 cells. Cell viability was assessed by MTT assay. Cells were treated with increasing concentrations of investigated compounds for 72 h. Results are given as mean  $\pm$  SD (n = 3-4) and  $\text{IC}_{50}$  values are indicated.

**Figure S34.** Cytotoxicity of **5a-o**, doxorubicin, cisplatin, and etoposide against SW480 cells. Cell viability was assessed by MTT assay. Cells were treated with increasing concentrations of investigated compounds for 72 h. Results are given as mean  $\pm$  SD (n = 3-4) and  $\text{IC}_{50}$  values are indicated.

**Figure S35.** Cytotoxicity of **5e**, **5f**, **5m**, **5o**, doxorubicin, and cisplatin against MRC-5 cells. Cell viability was assessed by MTT assay. Cells were treated with increasing concentrations of investigated compounds for 72 h. Results are given as mean  $\pm$  SD (n = 3-4) and  $\text{IC}_{50}$  values are indicated.

**Figure S36.** Representation of self-docking results. The co-crystallized inhibitors (cyan) docked into the binding sites and superimposed on co-crystallized inhibitors (yellow) in the crystal structures of topoisomerases: a) Human Topo I- DNA (PDB ID: 1T8I), b) Human Topo II $\alpha$  ATPase-no DNA (PDB ID: 1ZXM), c) Human Topo II $\alpha$  ATPase-no DNA (PDB ID: 1ZXN), d) Human Topo II $\alpha$ - DNA (PDB ID: 5GWK), and e) Human Topo II $\beta$ -DNA (PDB ID: 4G0V).

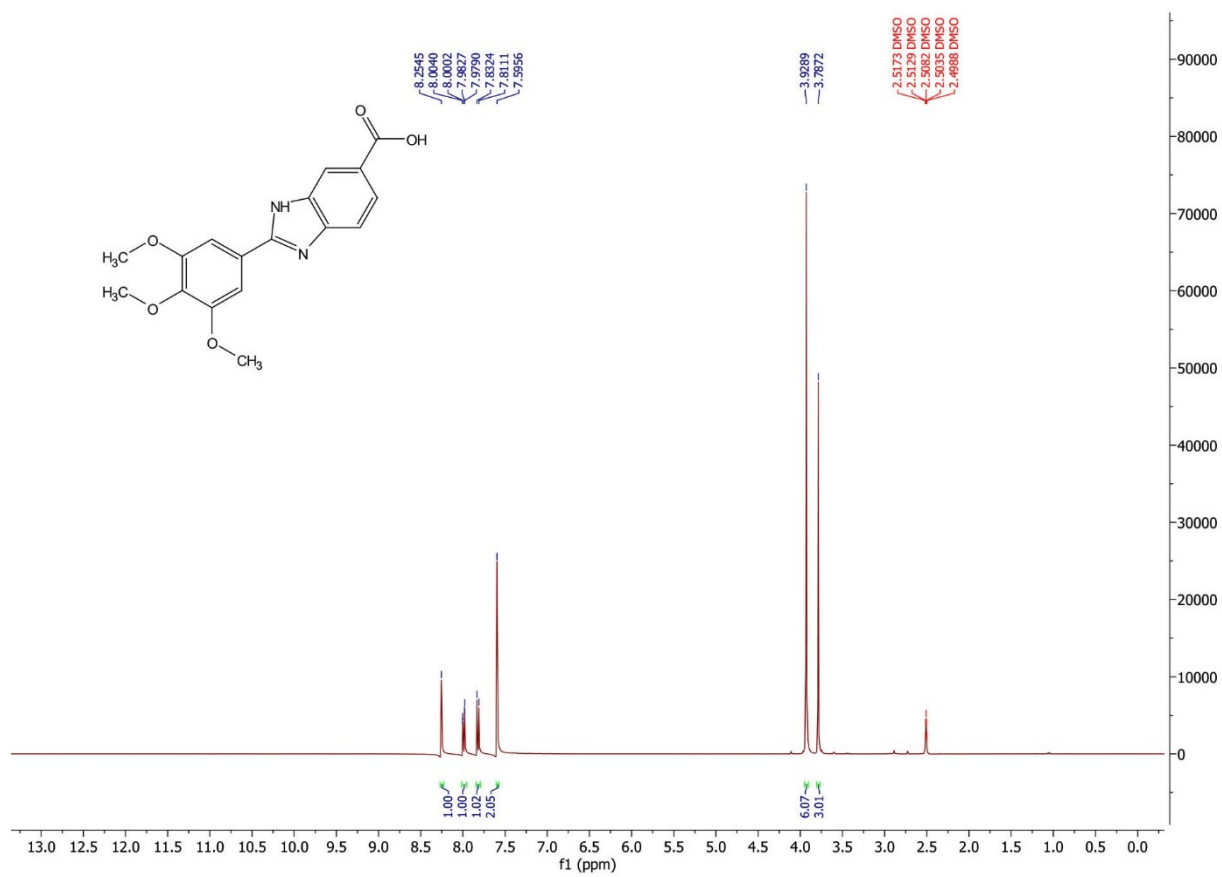

**Figure S1.** The <sup>1</sup>H-NMR spectrum of **3**.

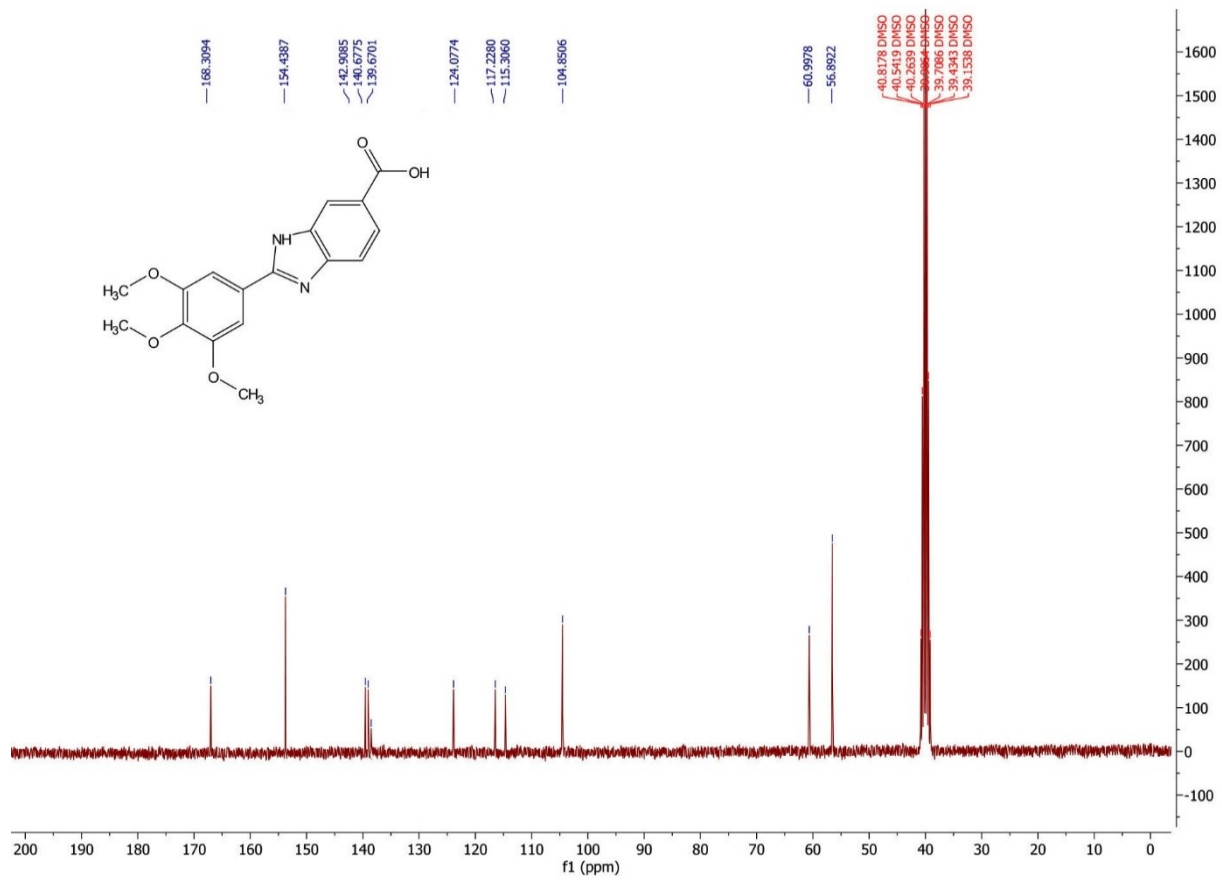

**Figure S2.** The  $^{13}\text{C}$ -NMR spectrum of **3**.

Shahrivar.196.fid  
Dr. Sayah- code 6

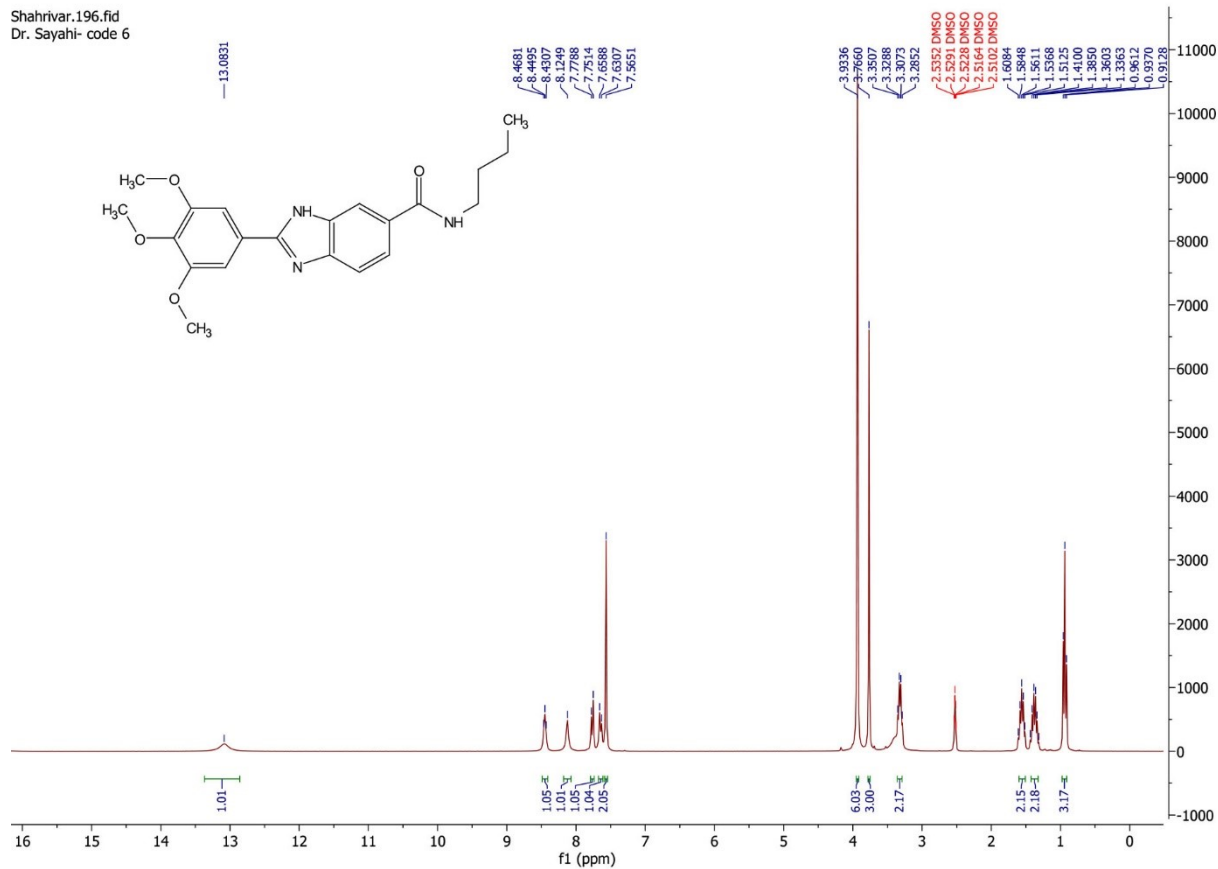

Figure S3. The <sup>1</sup>H-NMR spectrum of 5a.

Shahrivar.197.fid  
Dr. Sayahi- code 6-

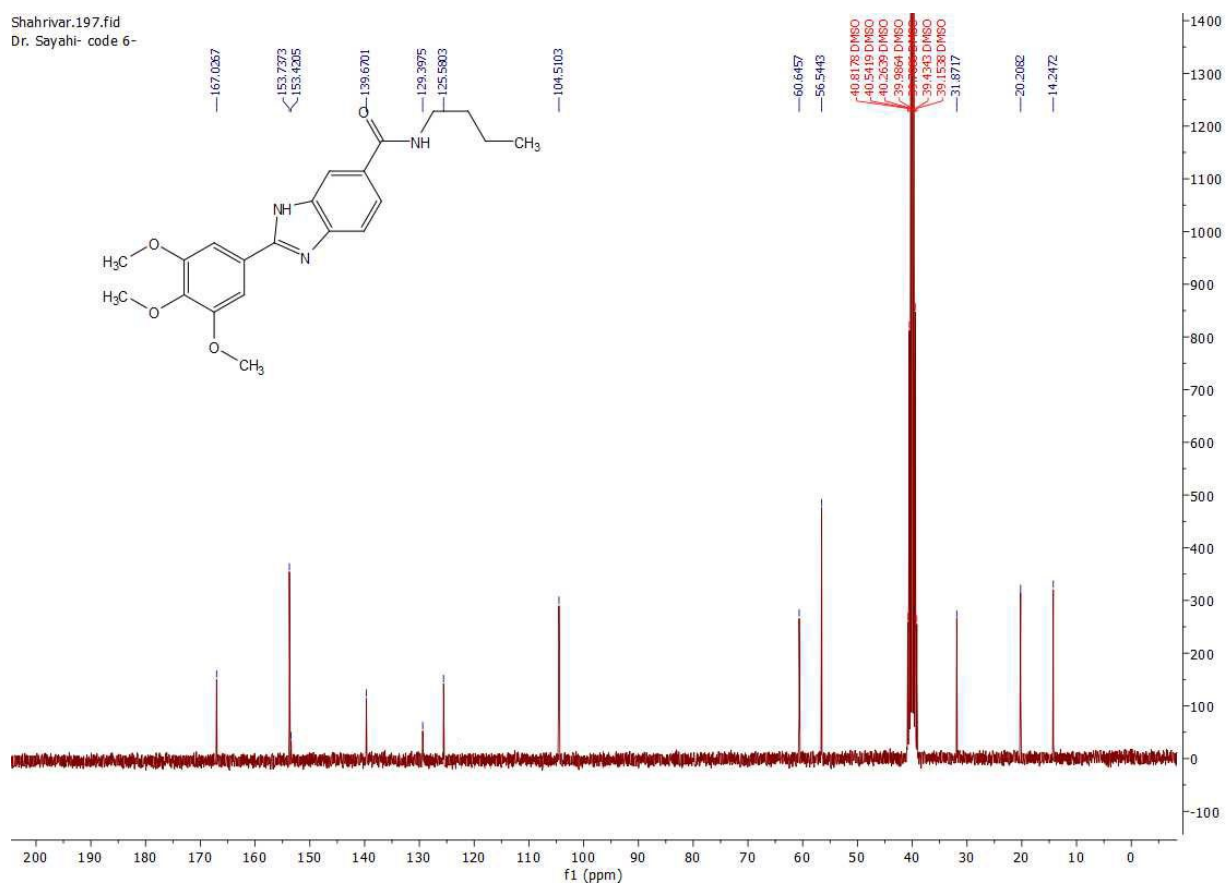

Figure S4. The  $^{13}\text{C}$ -NMR spectrum of **5a**.

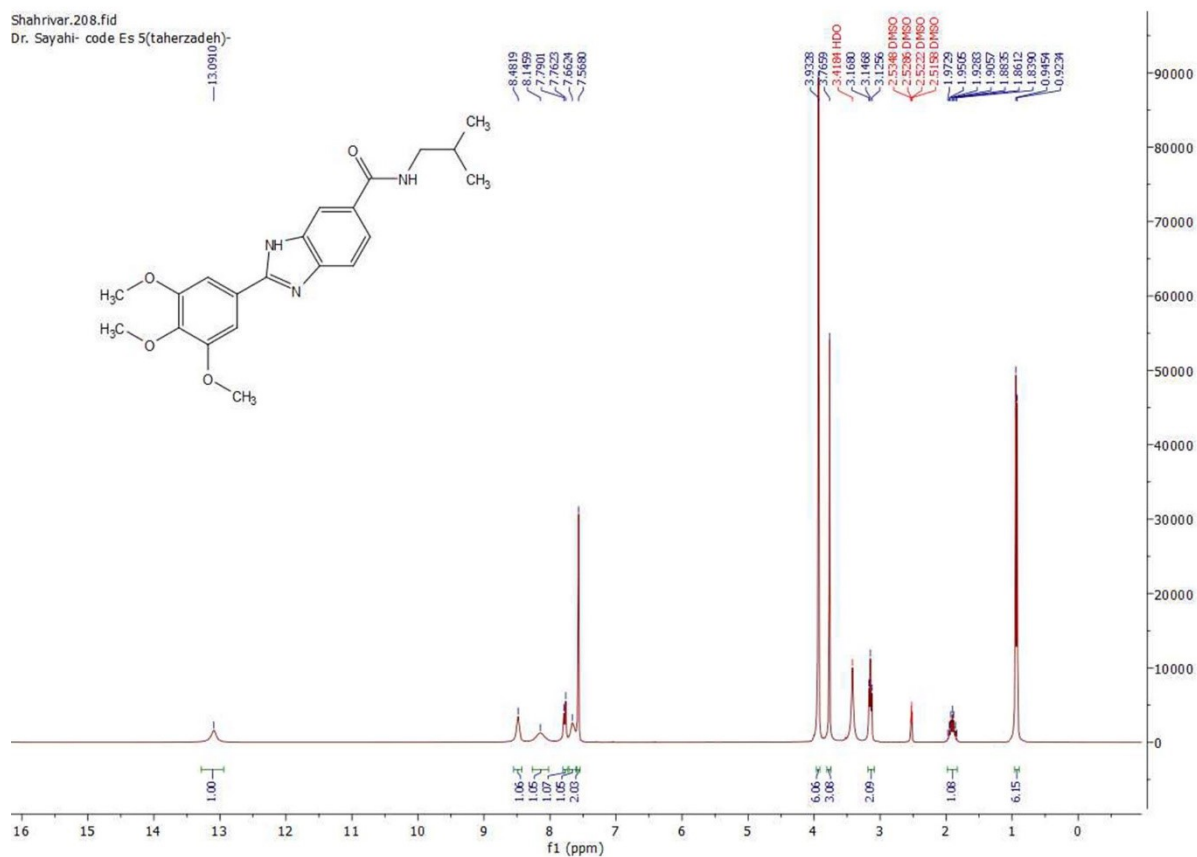

**Figure S5.** The <sup>1</sup>H-NMR spectrum of **5b**.

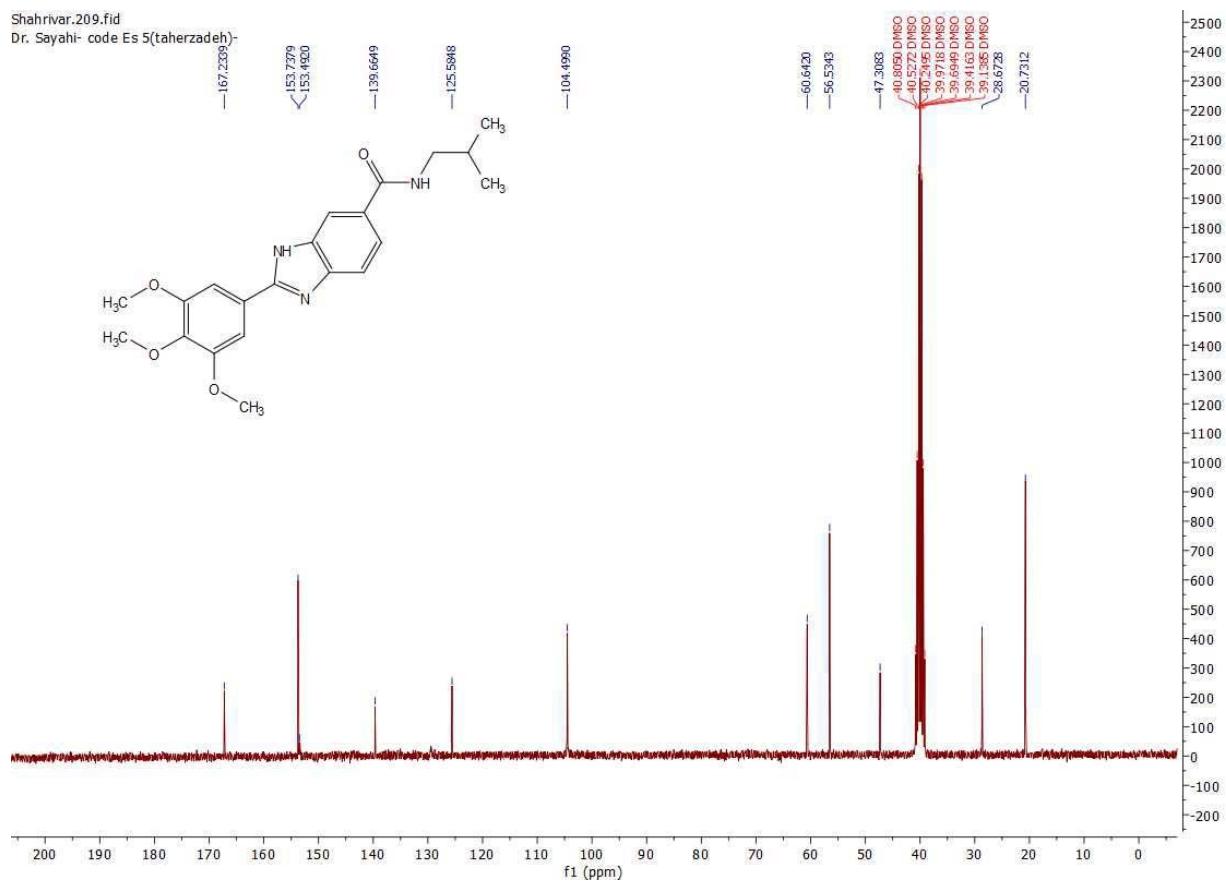

**Figure S6.** The  $^{13}\text{C-NMR}$  spectrum of **5b**.



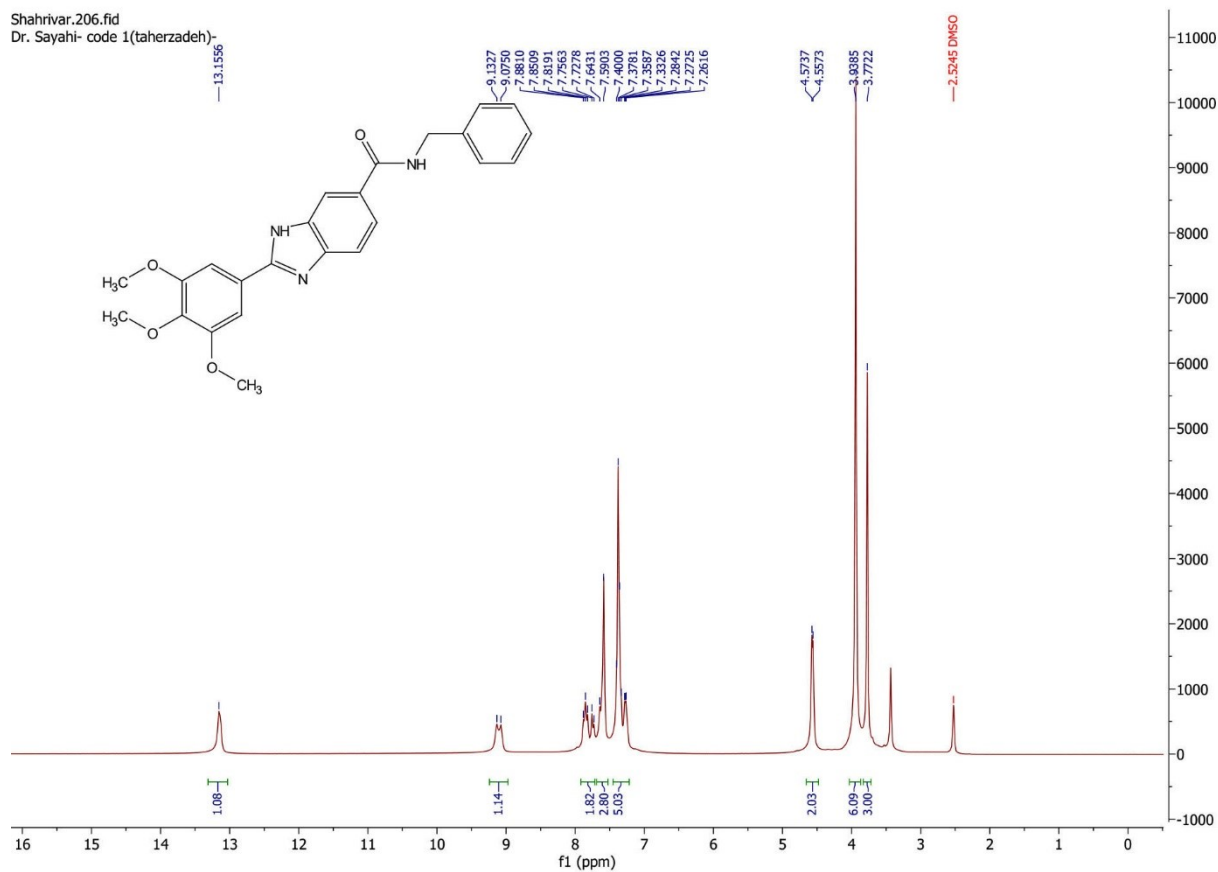

**Figure S7.** The  $^1\text{H-NMR}$  spectrum of **5c**.

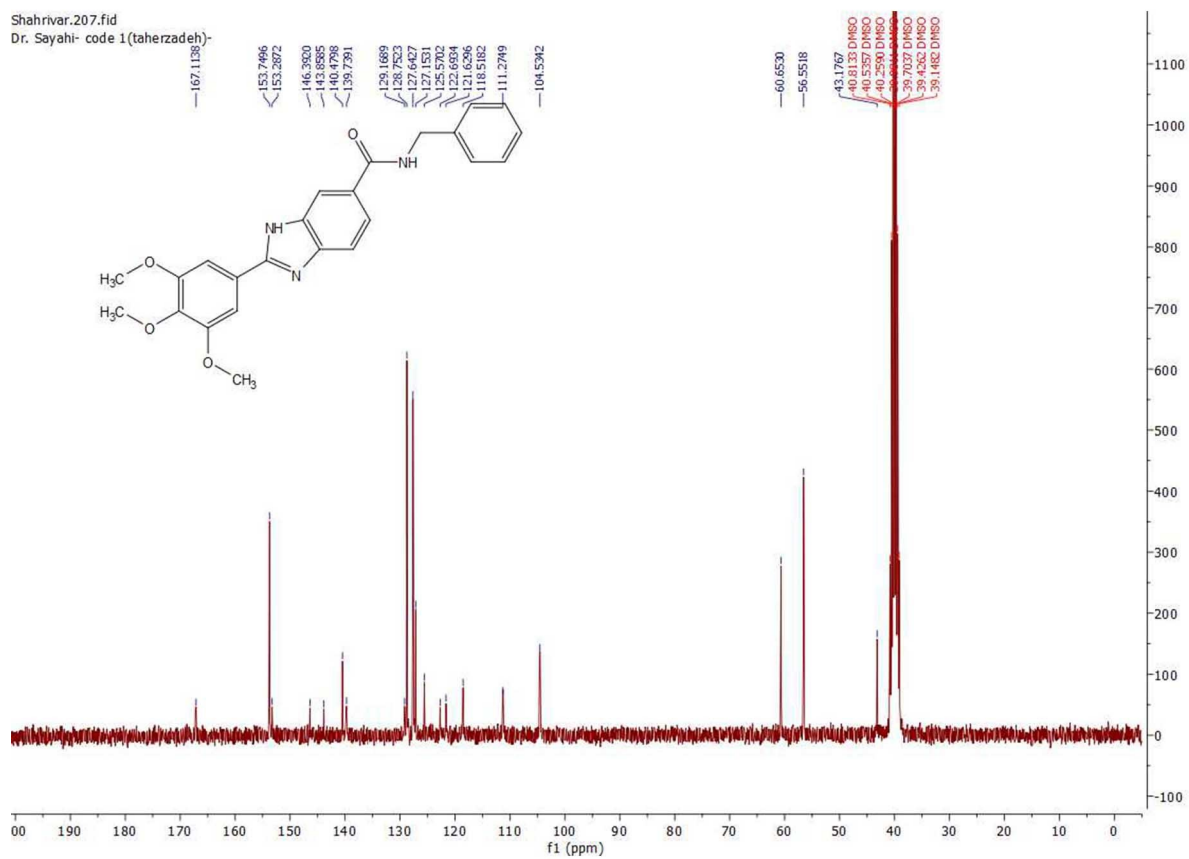

**Figure S8.** The  $^{13}\text{C}$ -NMR spectrum of **5c**.

Shahrivar.200.fid  
Dr. Sayahi- code 3(taherzadeh)-

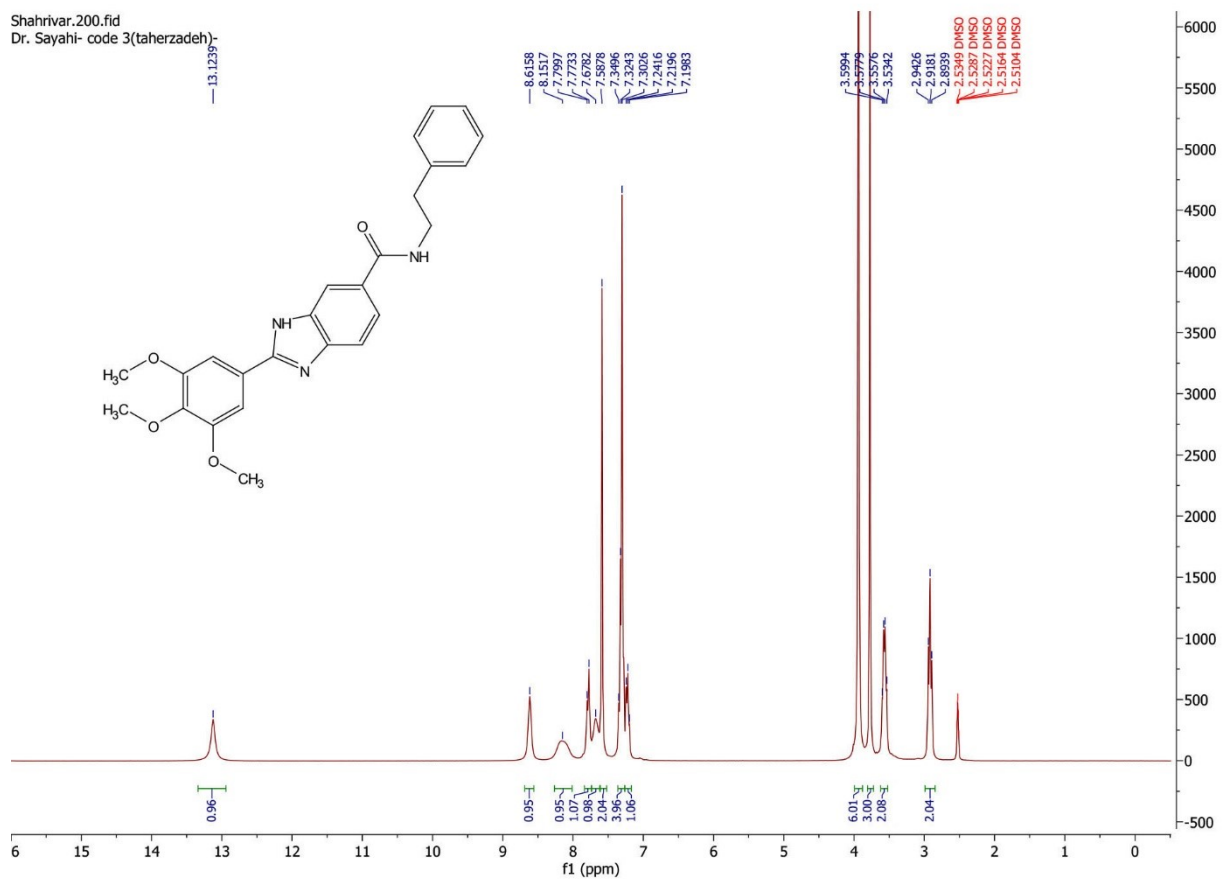

Figure S9. The  $^1\text{H-NMR}$  spectrum of **5d**.

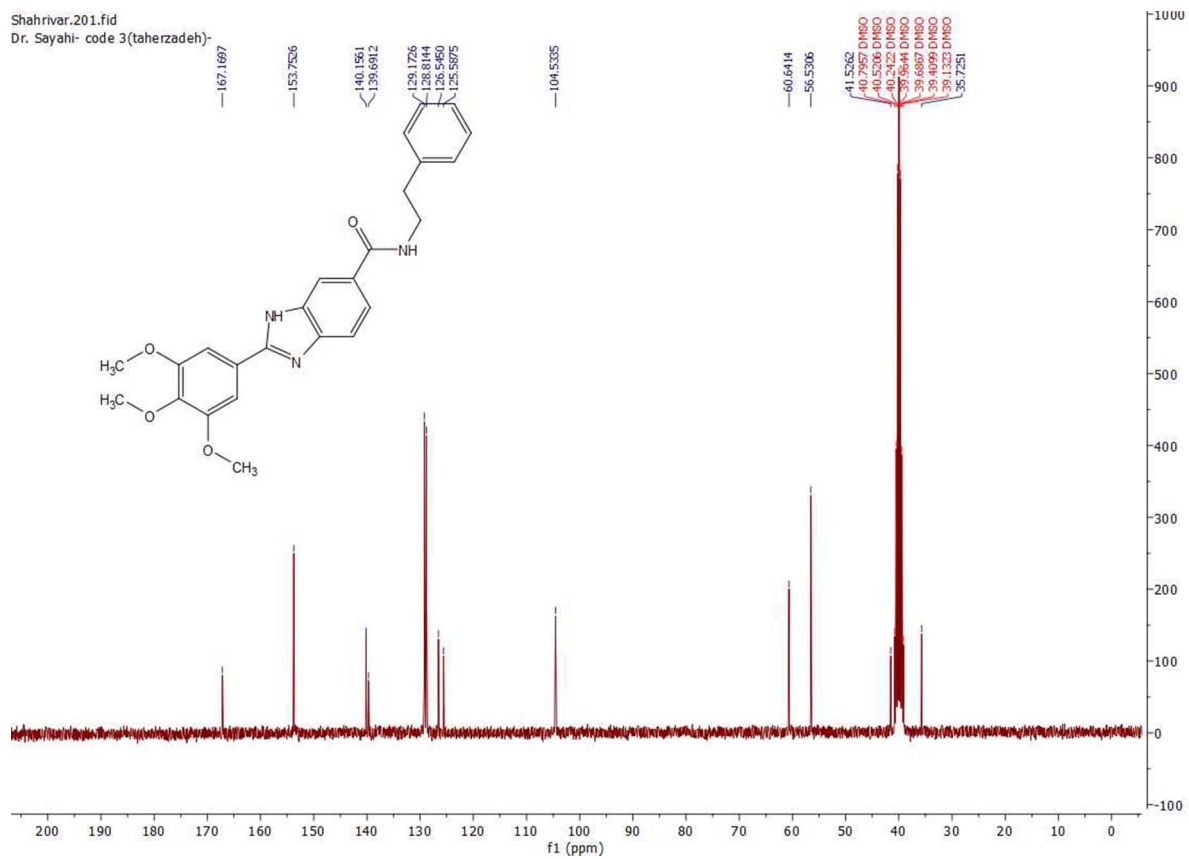

**Figure S10.** The  $^{13}\text{C}$ -NMR spectrum of **5d**.

Shahrivar.198.fid  
Dr. Sayahi- code 2(taherzadeh)-

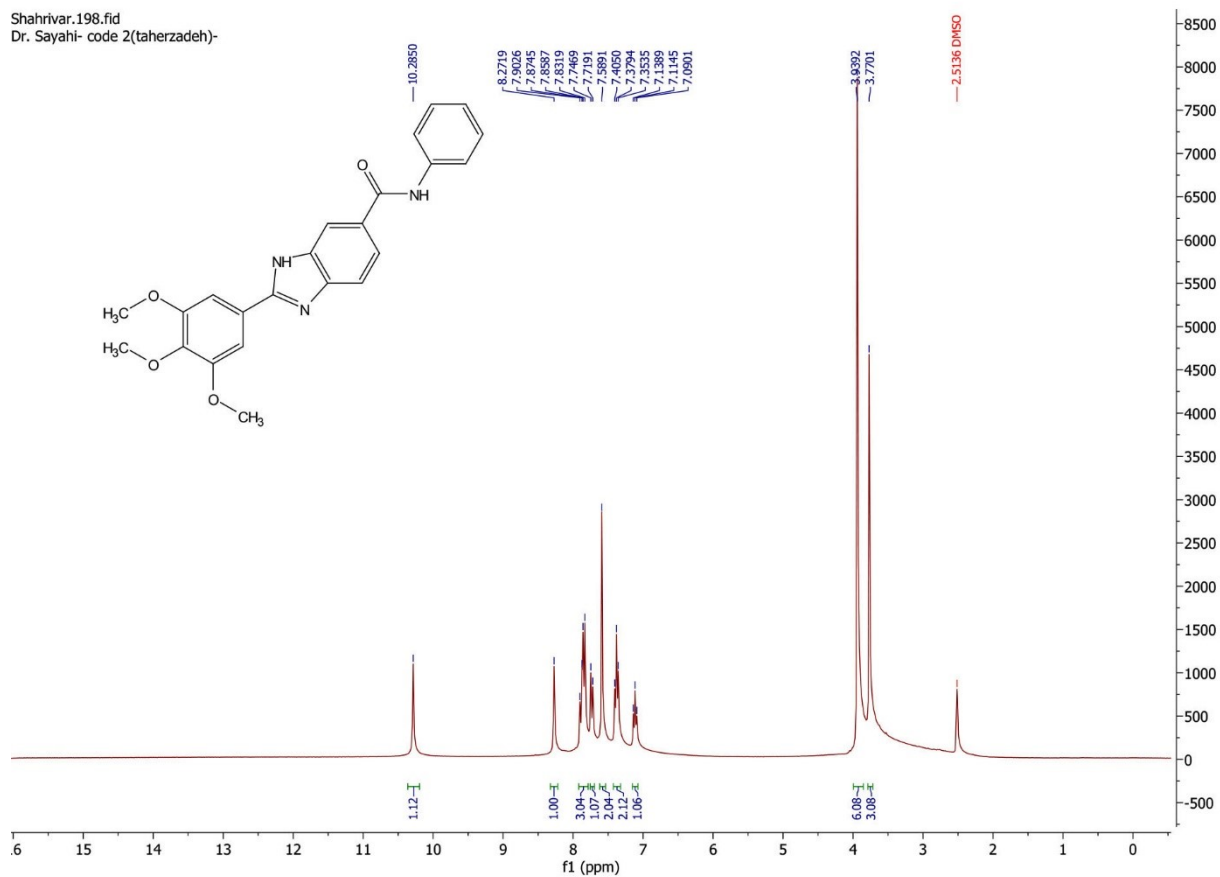

Figure S11. The  $^1\text{H-NMR}$  spectrum of 5e.

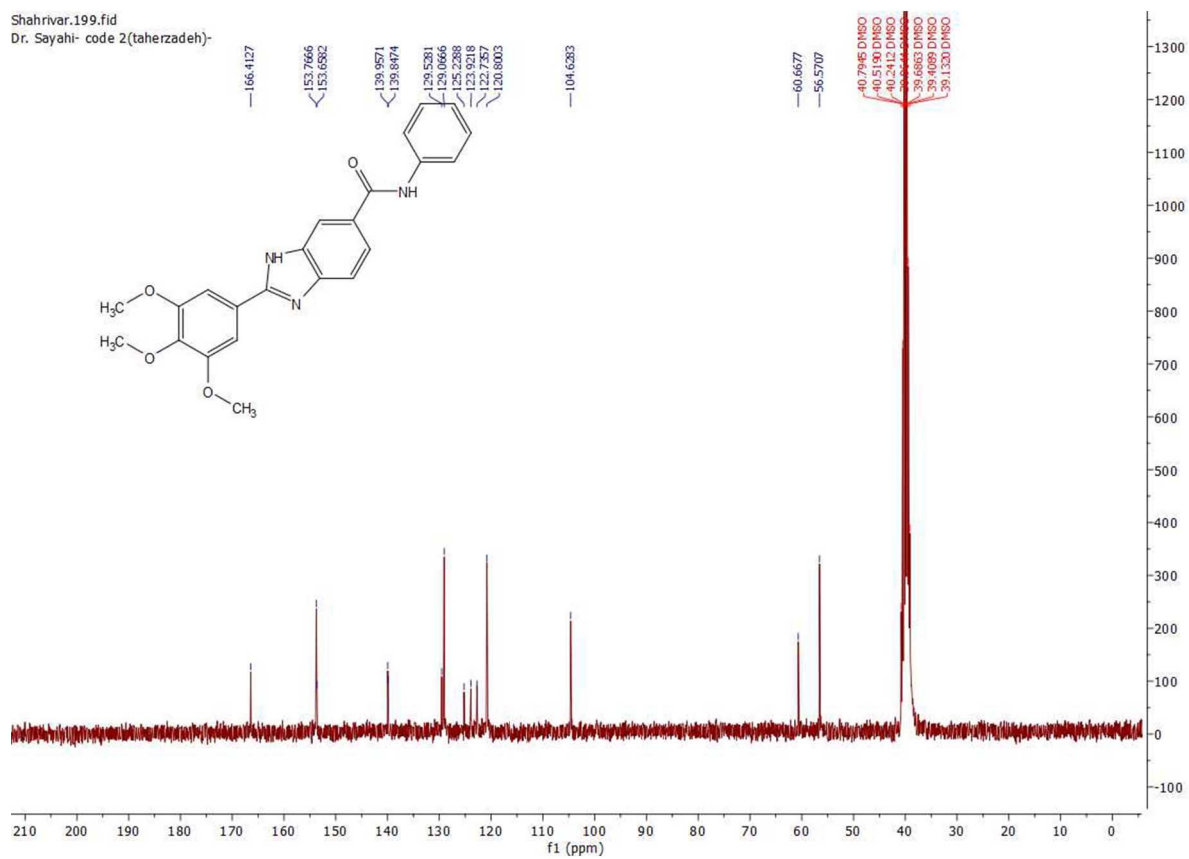

Figure S12. The  $^{13}\text{C}$ -NMR spectrum of **5e**.

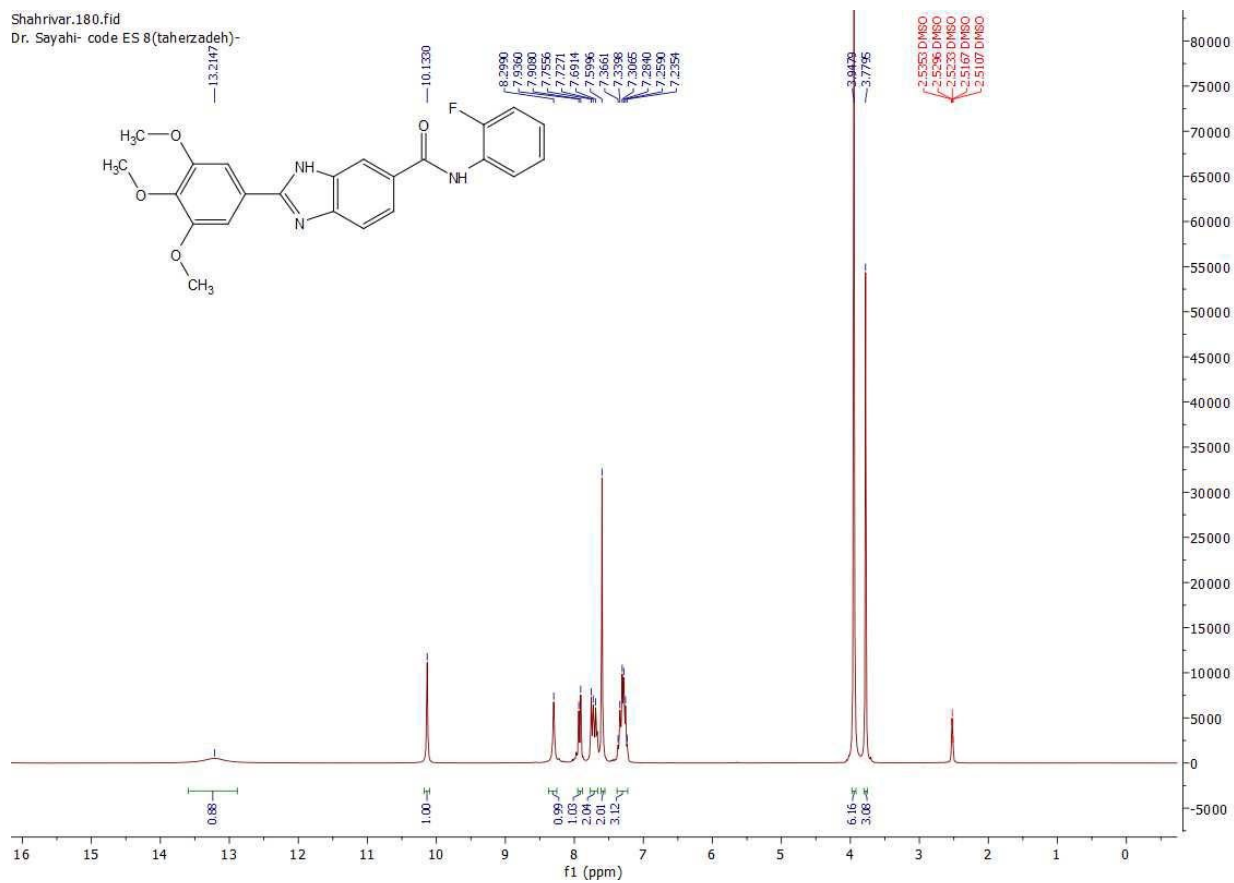

**Figure S13.** The  $^1\text{H}$ -NMR spectrum of **5f**.

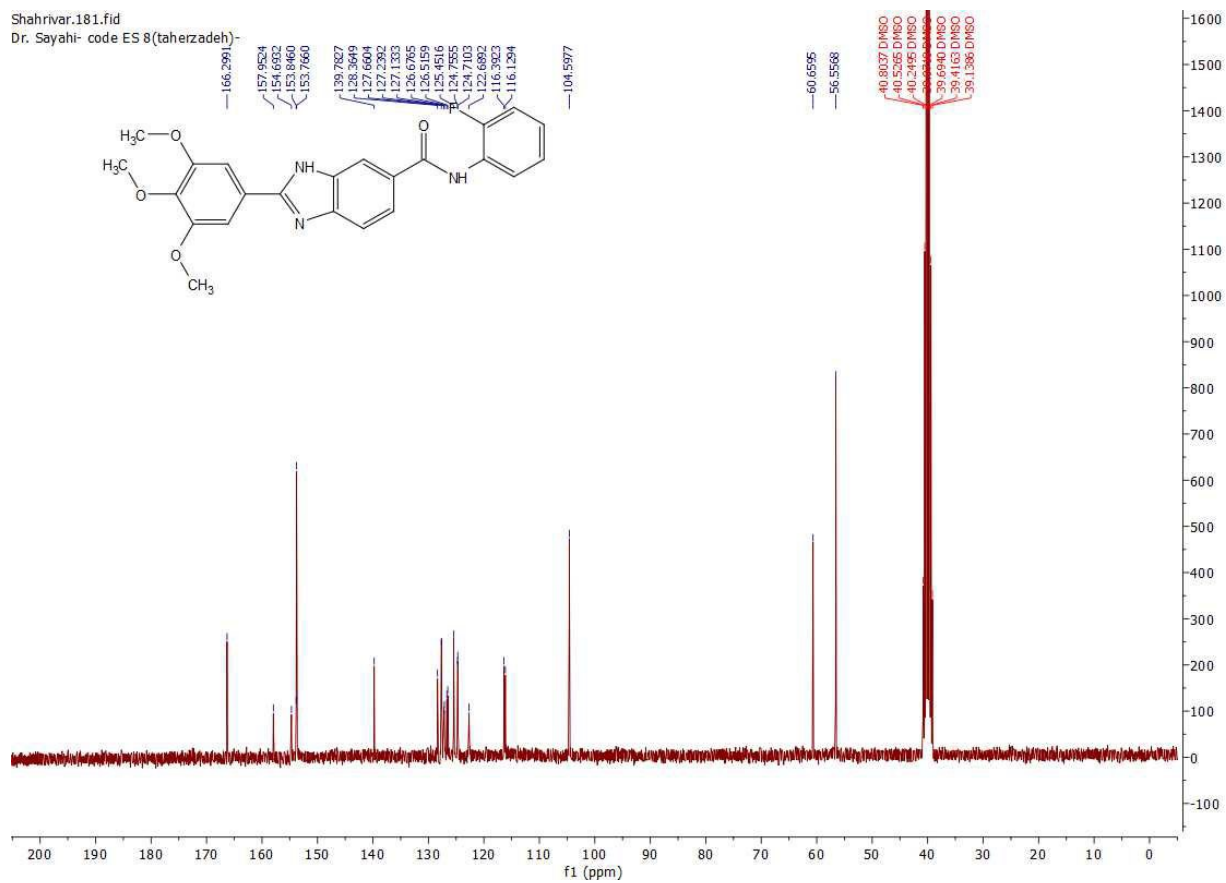

Figure S14. The  $^{13}\text{C}$ -NMR spectrum of **5f**.



Shahrivar.178.fid  
Dr. Sayahi- code ES 13(taherzadeh)-

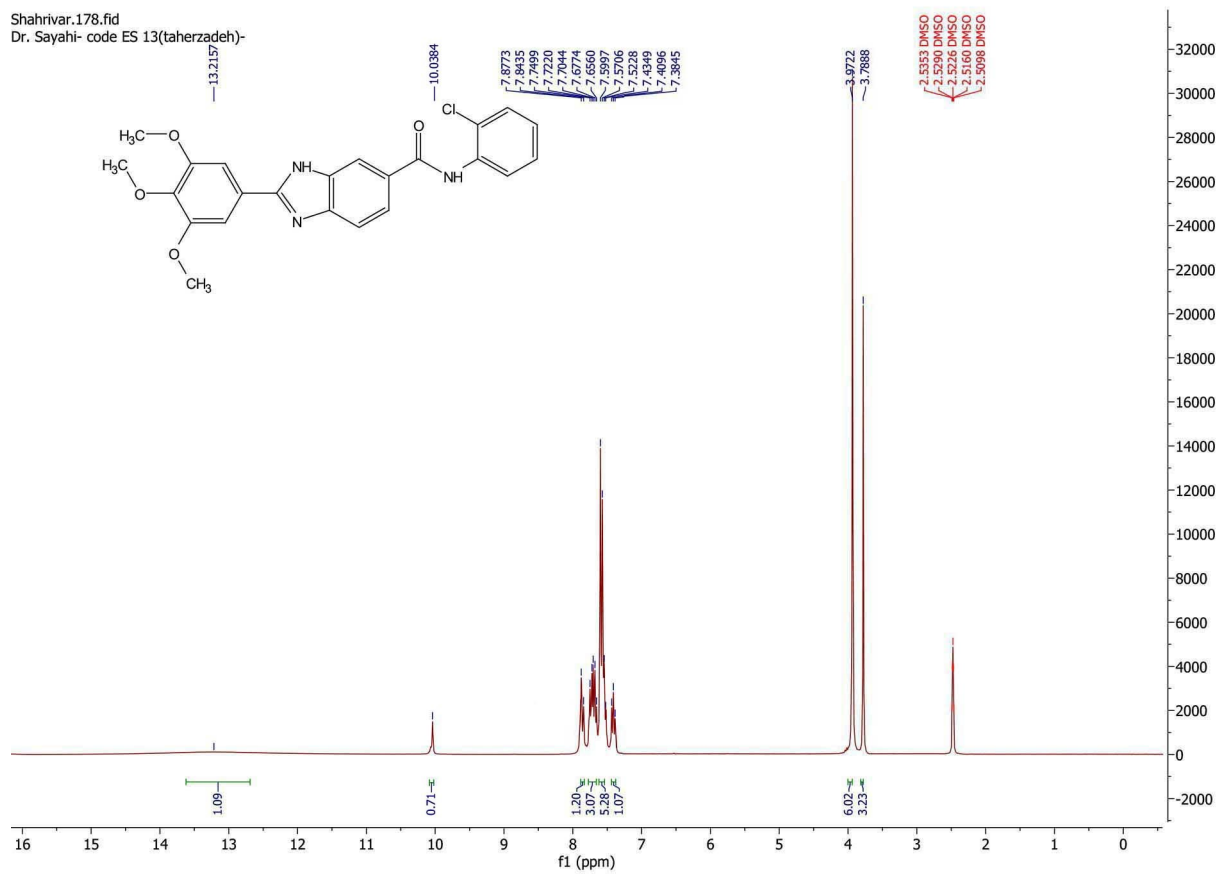

Figure S15. The <sup>1</sup>H-NMR spectrum of 5g.

Shahrivar.179.fid  
Dr. Sayahi- code ES 13(tahezadeh)-

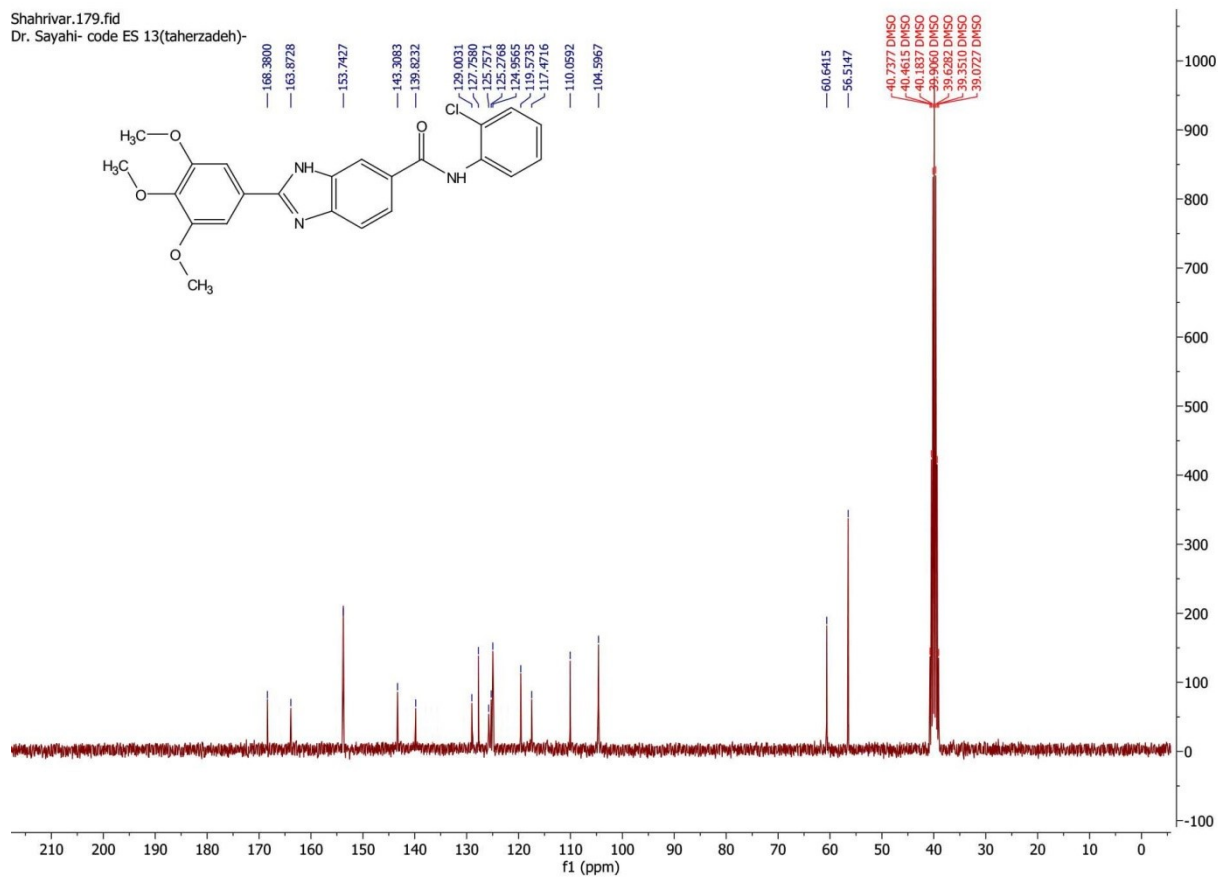

Figure S16. The  $^{13}\text{C}$ -NMR spectrum of **5g**.

Shahrivar.202.fid  
Dr. Sayahi- code 7(taherzadeh)-

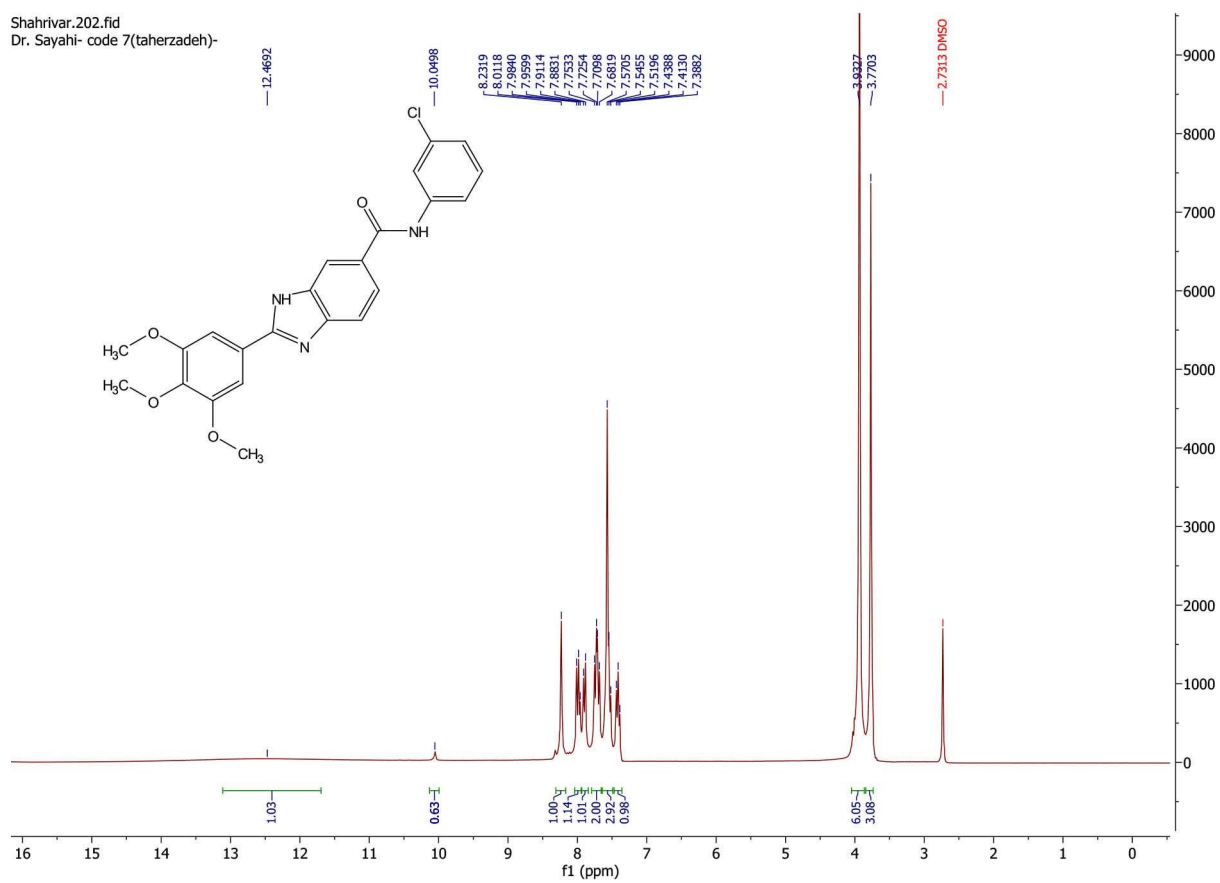

**Figure S17.** The <sup>1</sup>H-NMR spectrum of **5h**.

Shahrivar.203.fid  
Dr. Sayahi- code 7(taherzadeh)-

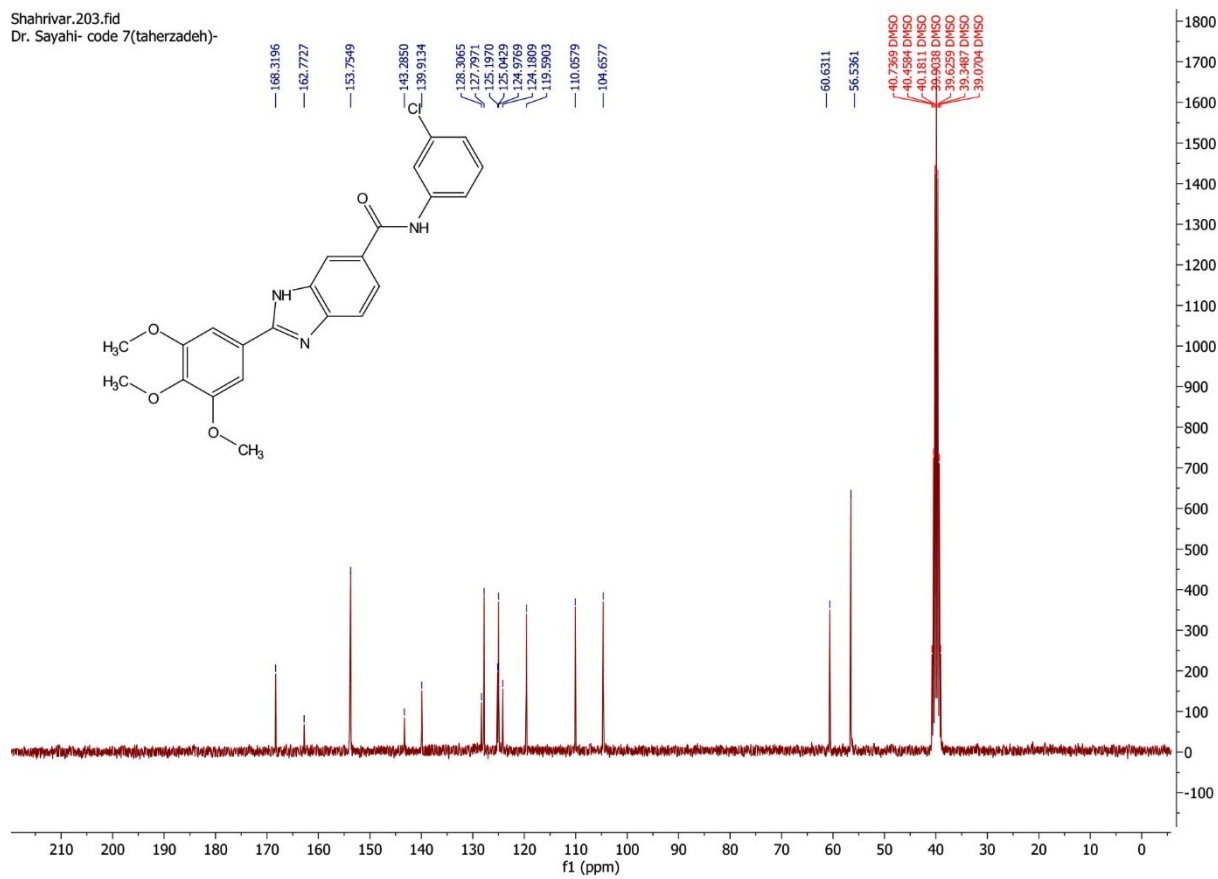

**Figure S18.** The <sup>13</sup>C-NMR spectrum of **5h**.

Shahrivar.190.fid  
Dr. Sayahi- code ES 15 (taherzadeh)-

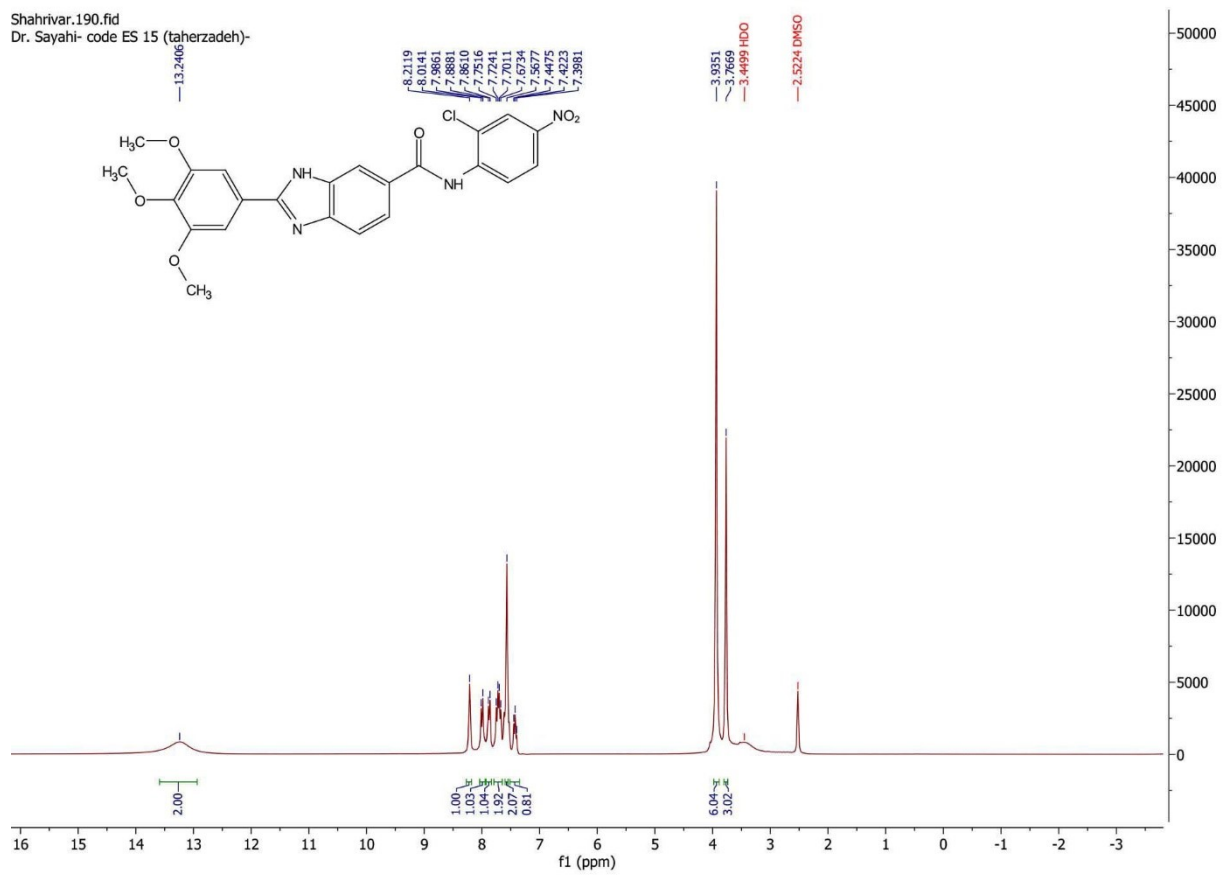

Figure S19. The <sup>1</sup>H-NMR spectrum of 5i.

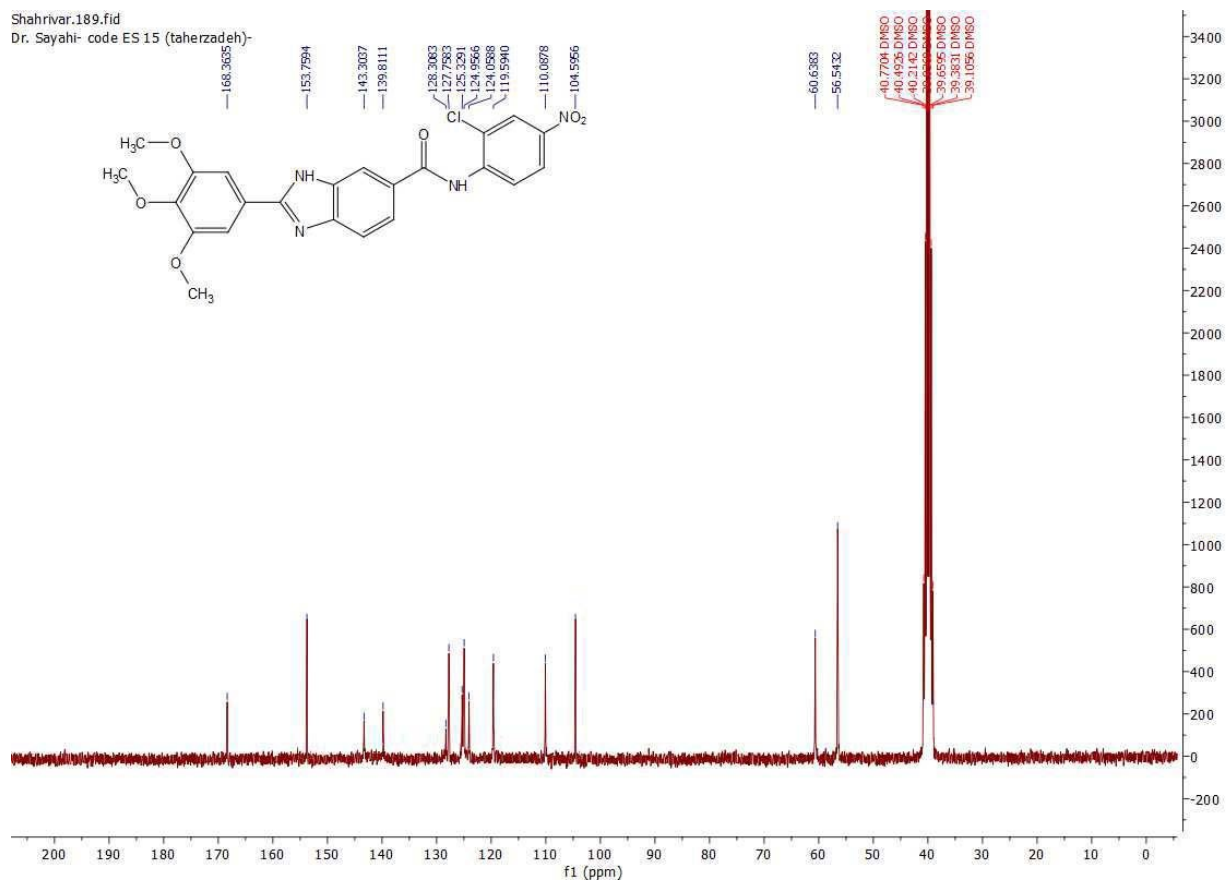

**Figure S20.** The  $^{13}\text{C}$ -NMR spectrum of **5i**.

Shahrivar.182.fid  
Dr. Sayahi- code ES 12 (taherzadeh)-

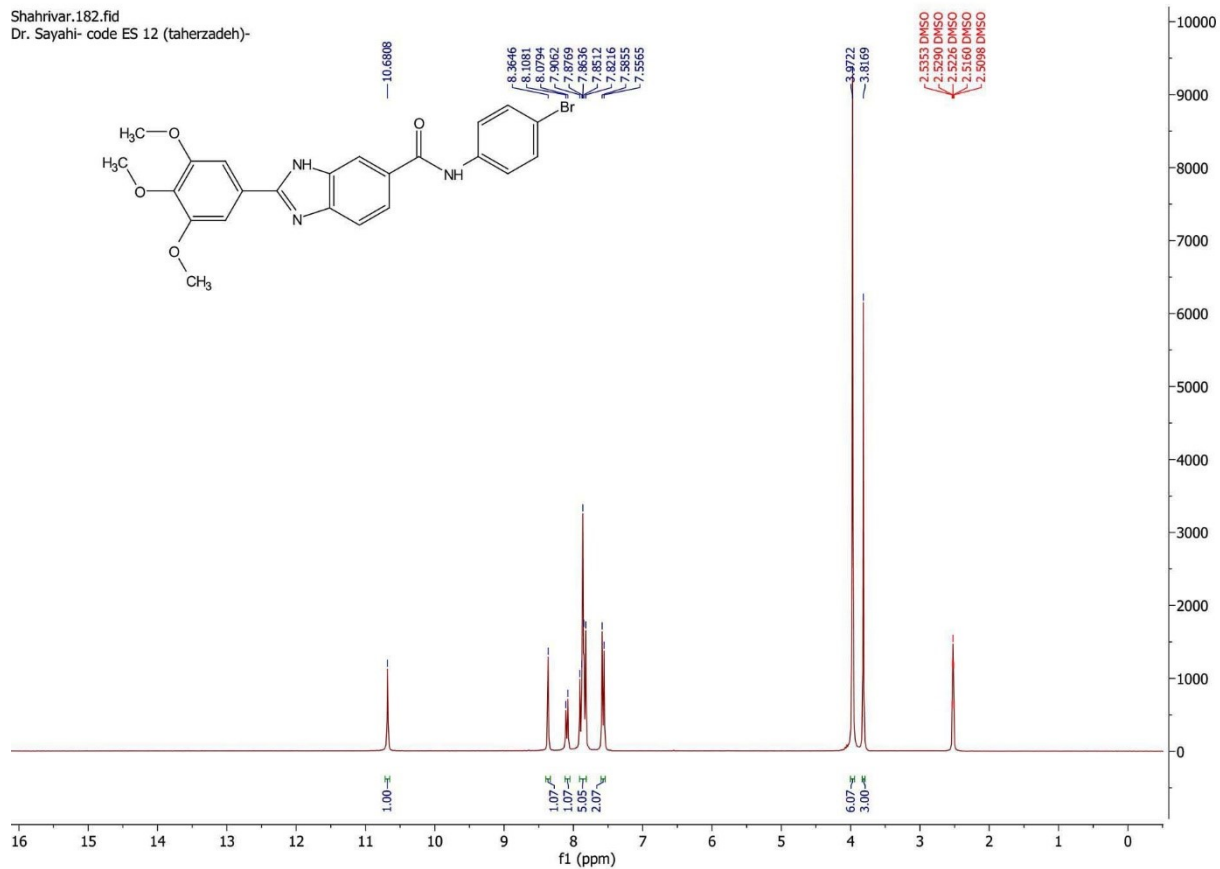

Figure S21. The <sup>1</sup>H-NMR spectrum of 5j.

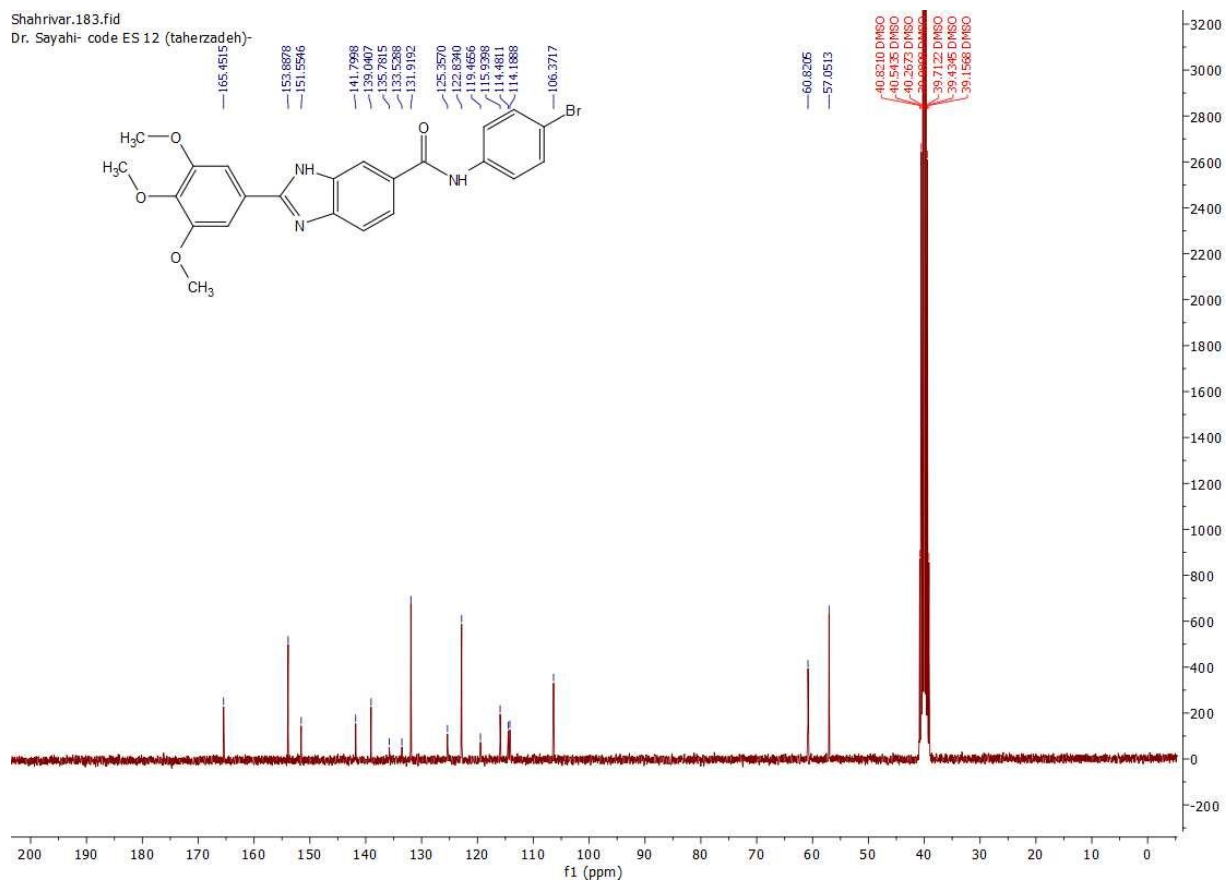

**Figure S22.** The  $^{13}\text{C}$ -NMR spectrum of **5j**.



Shahrivar.204.fid  
Dr. Sayahi- code 14(tahezadeh)-

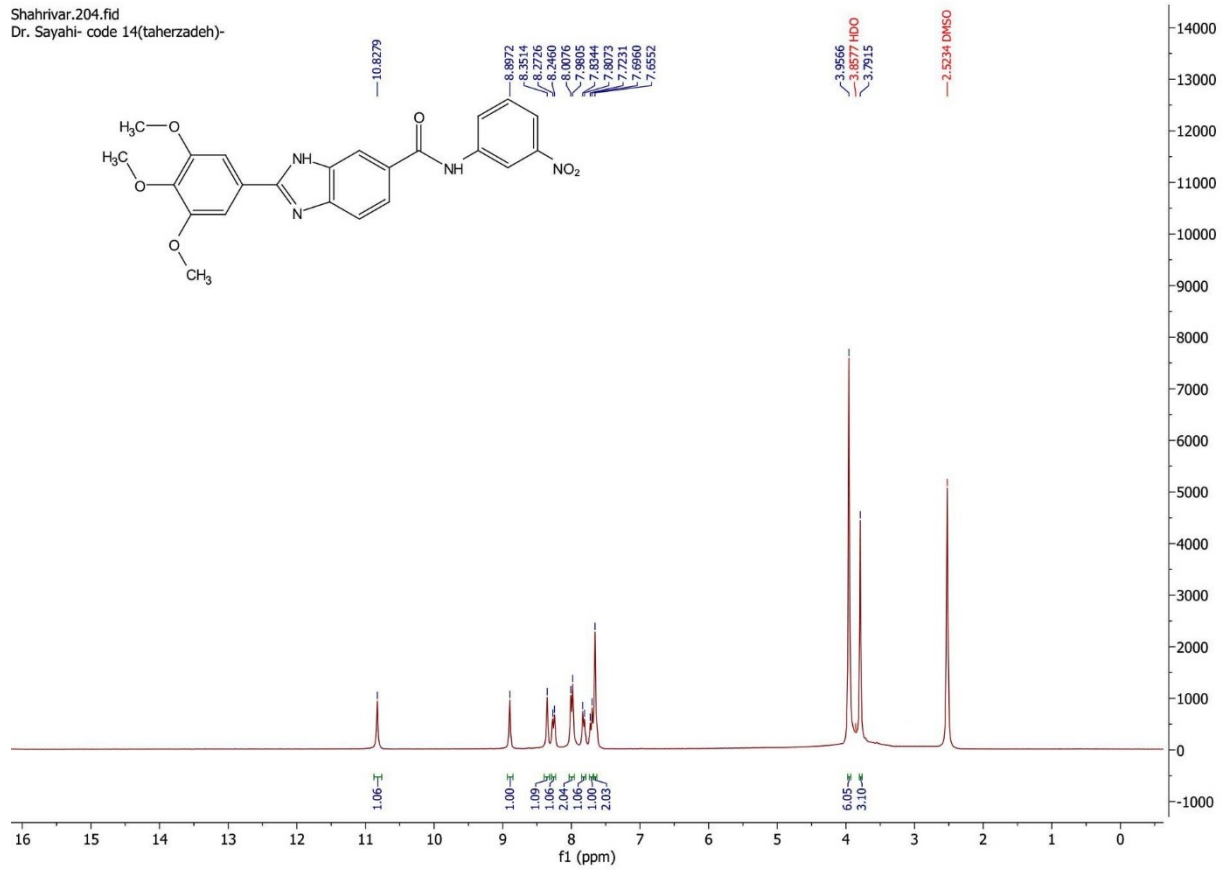

Figure S23. The <sup>1</sup>H-NMR spectrum of 5k.

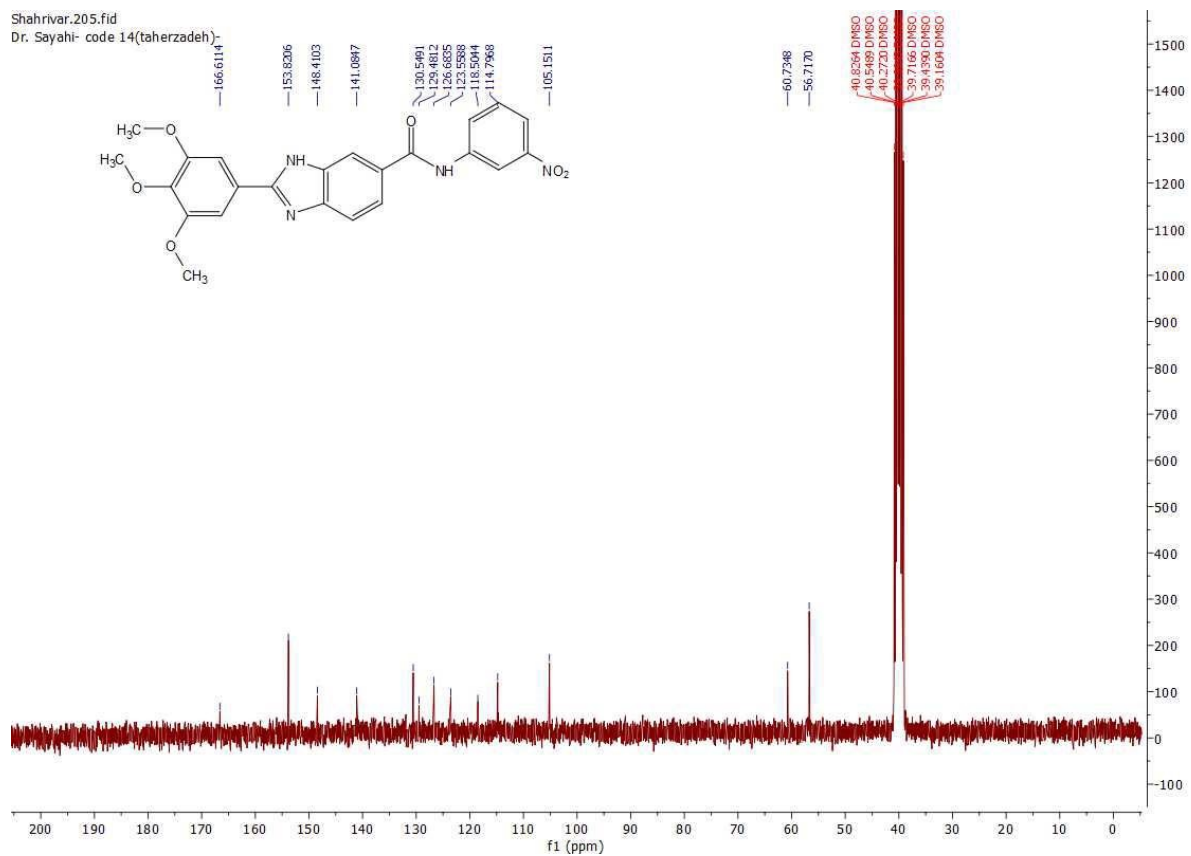

**Figure S24.** The  $^{13}\text{C}$ -NMR spectrum of **5k**.

Shahrivar.176.fid  
Dr. Sayahi- code ES 10(taherzadeh)-

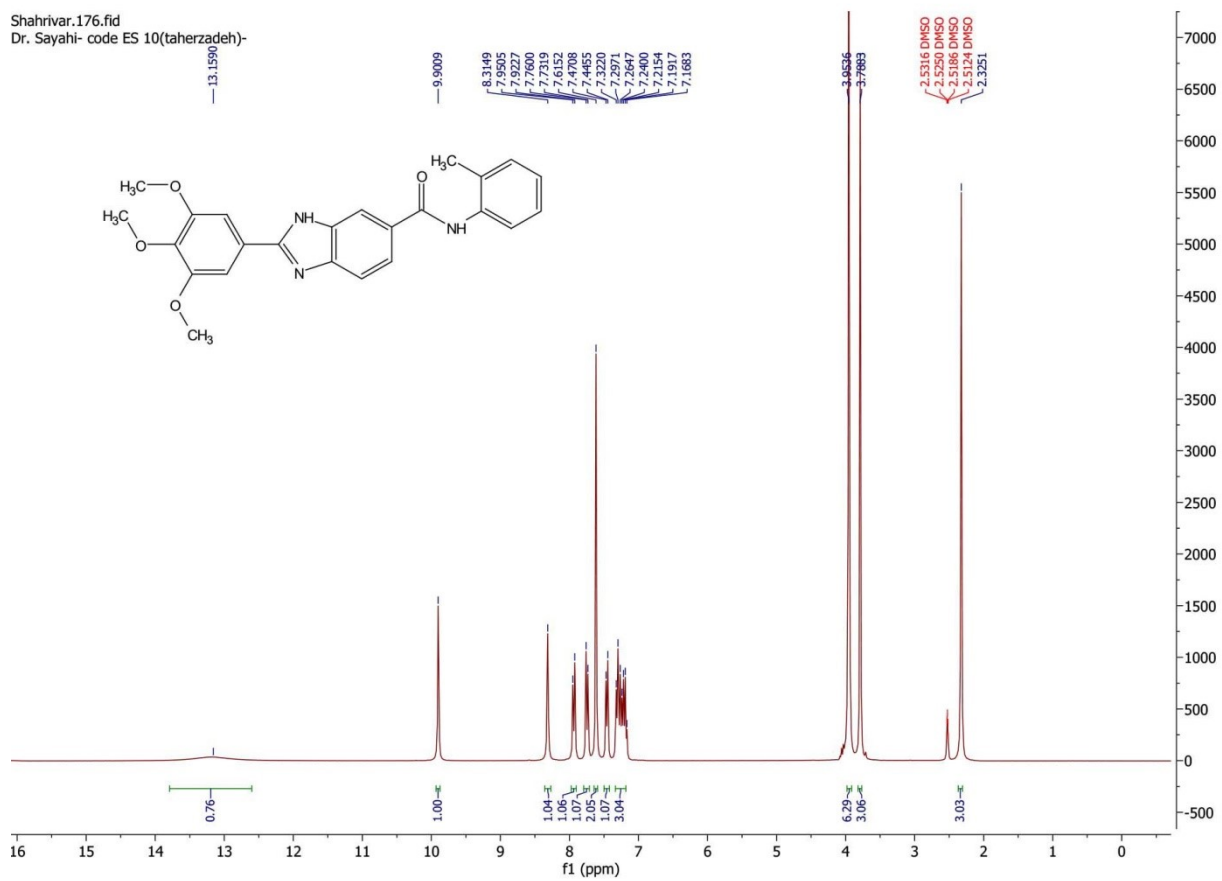

Figure S25. The <sup>1</sup>H-NMR spectrum of 5I.

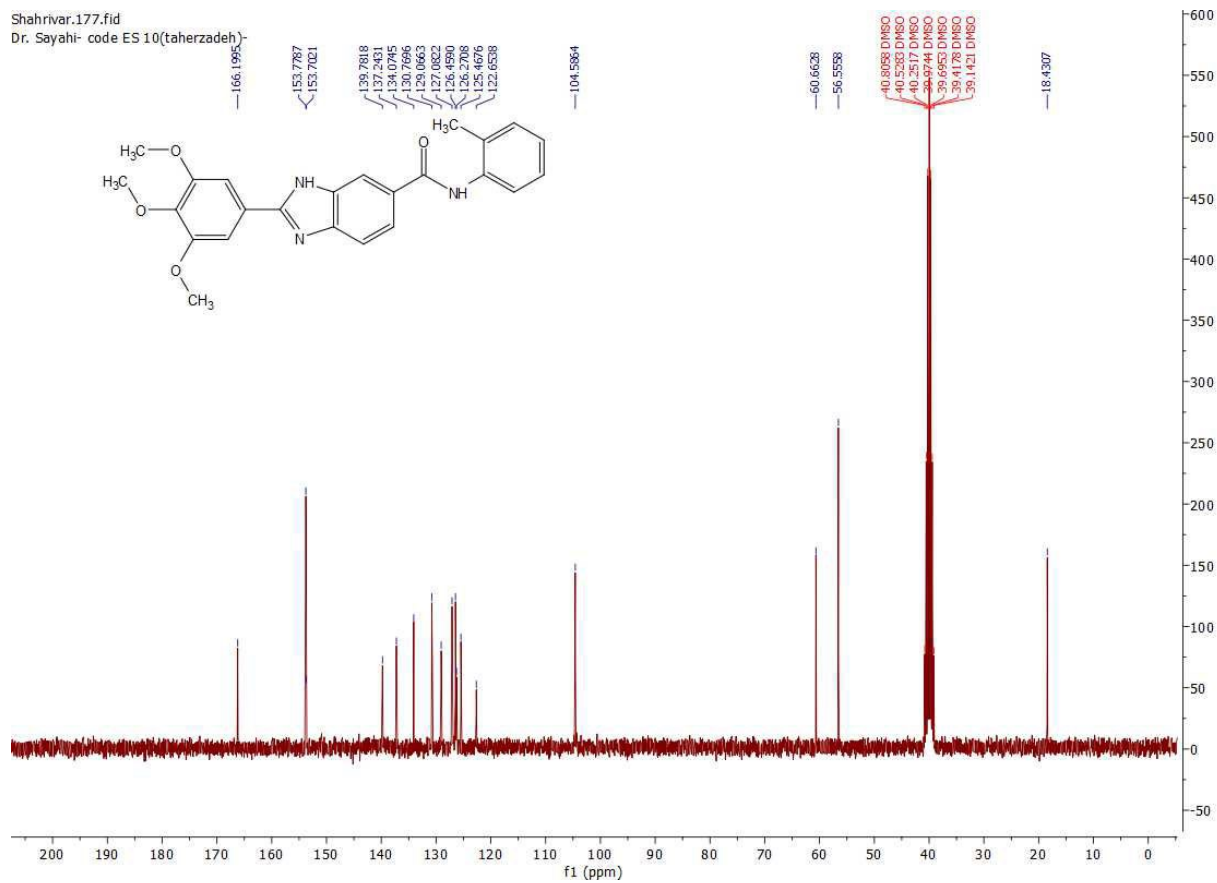

Figure S26. The  $^{13}\text{C}$ -NMR spectrum of **5I**.

Shahrivar.186.fid  
Dr. Sayahi- code ES 11 (taherzadeh)-

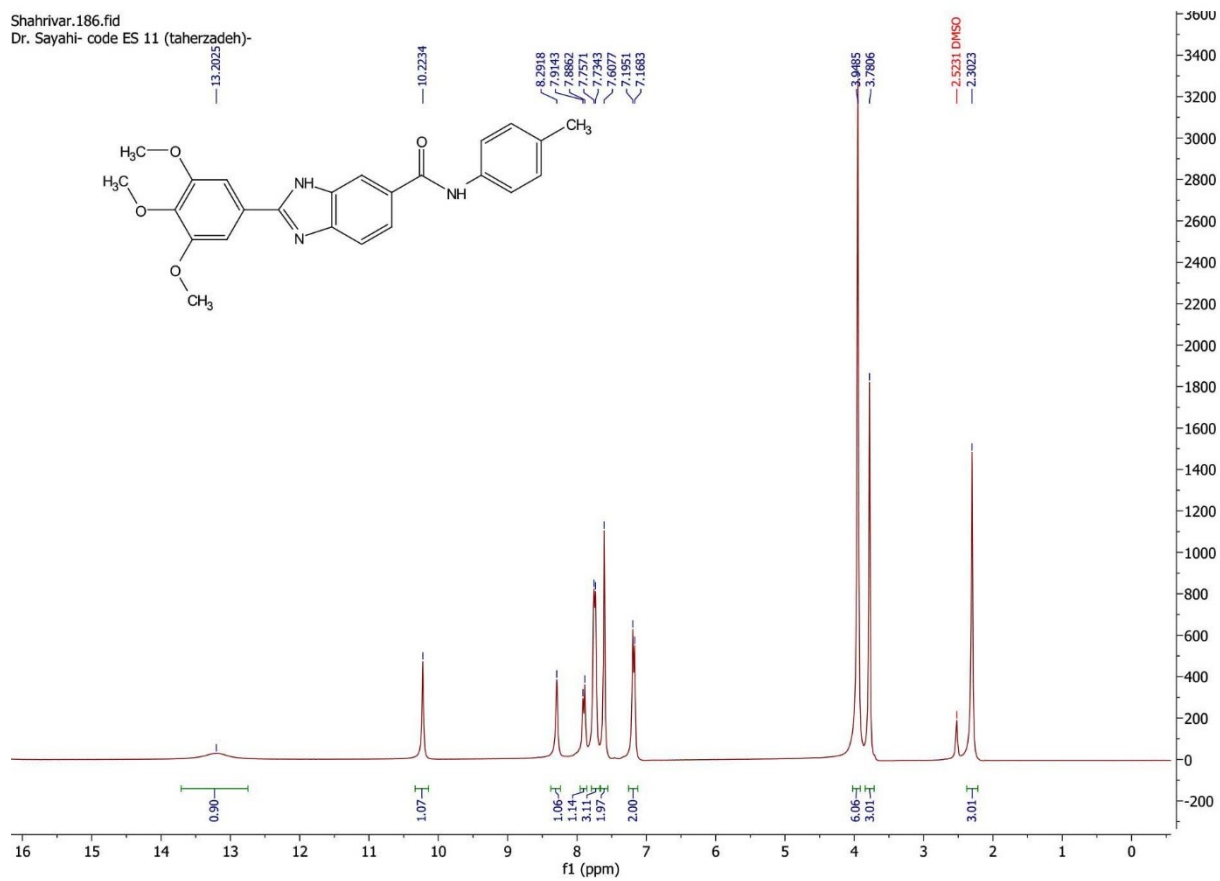

Figure S27. The  $^1\text{H}$ -NMR spectrum of **5m**.

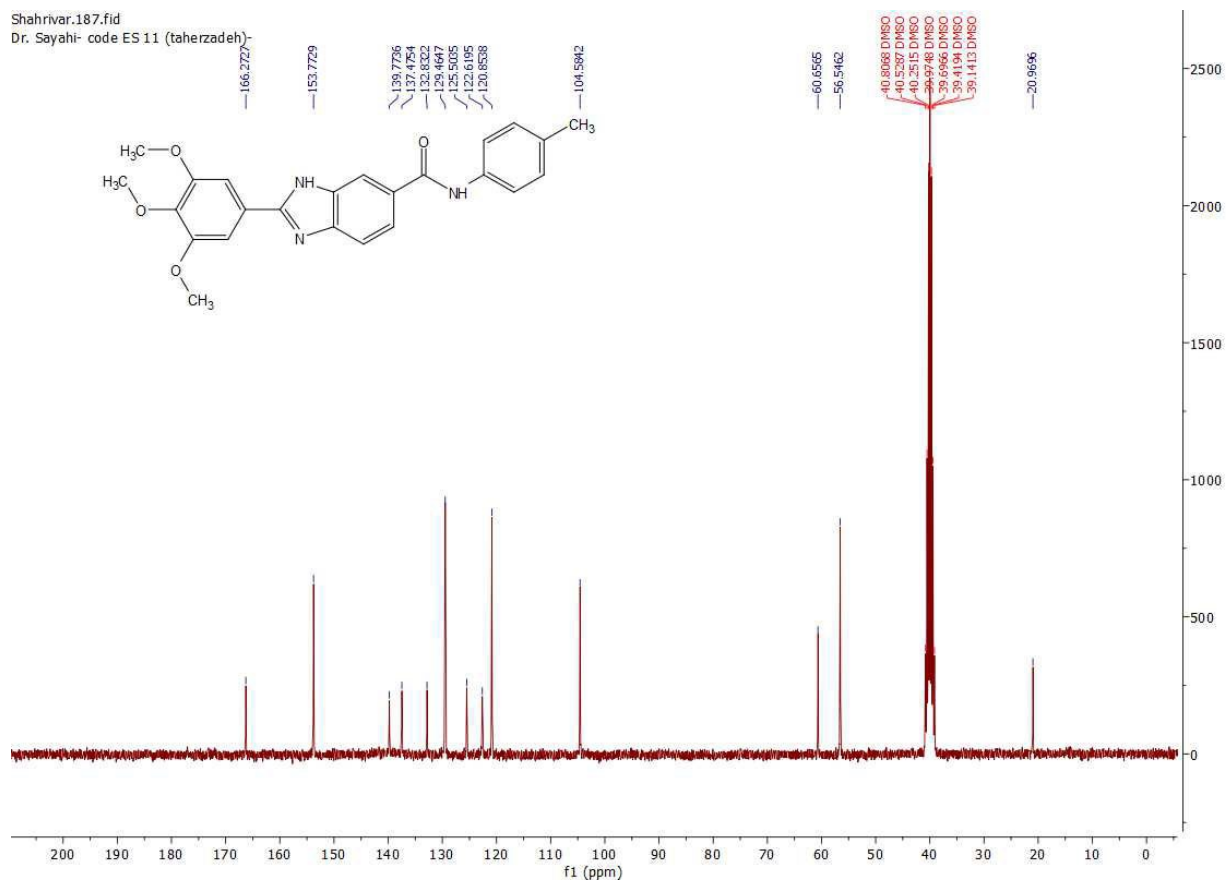

**Figure S28.** The  $^{13}\text{C}$ -NMR spectrum of **5m**.

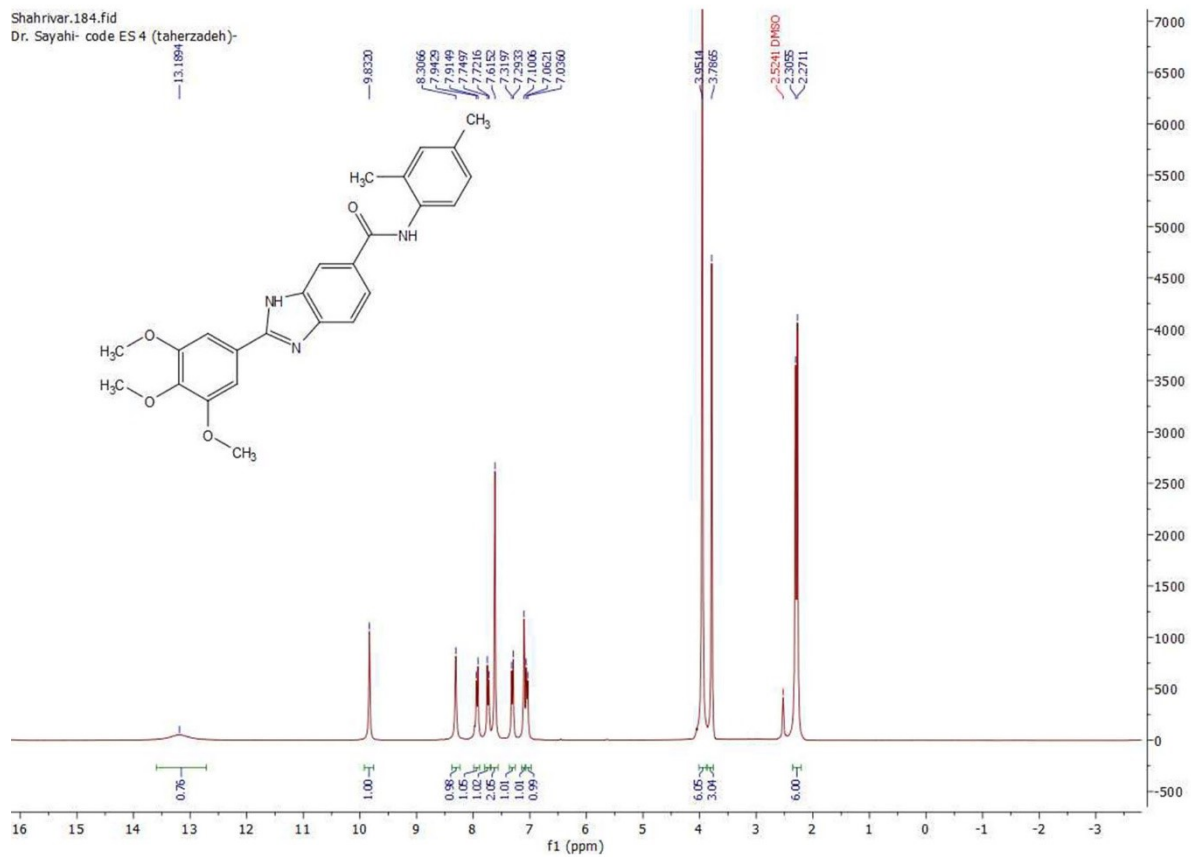

Figure S29. The  $^1\text{H-NMR}$  spectrum of 5n.

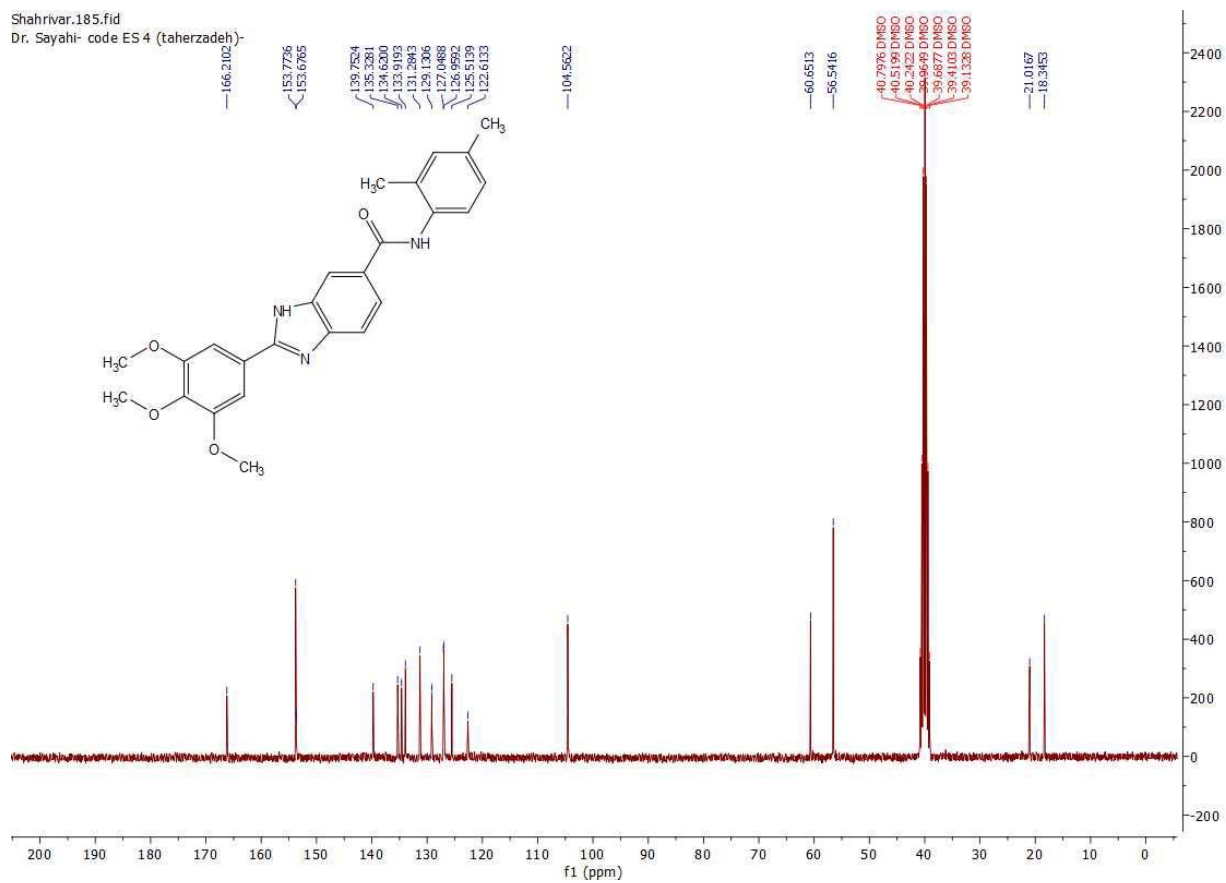

Figure S30. The  $^{13}\text{C}$ -NMR spectrum of 5n.



Shahrivar.191.fid  
Dr. Sayahi- code ES 9 (taherzadeh)-

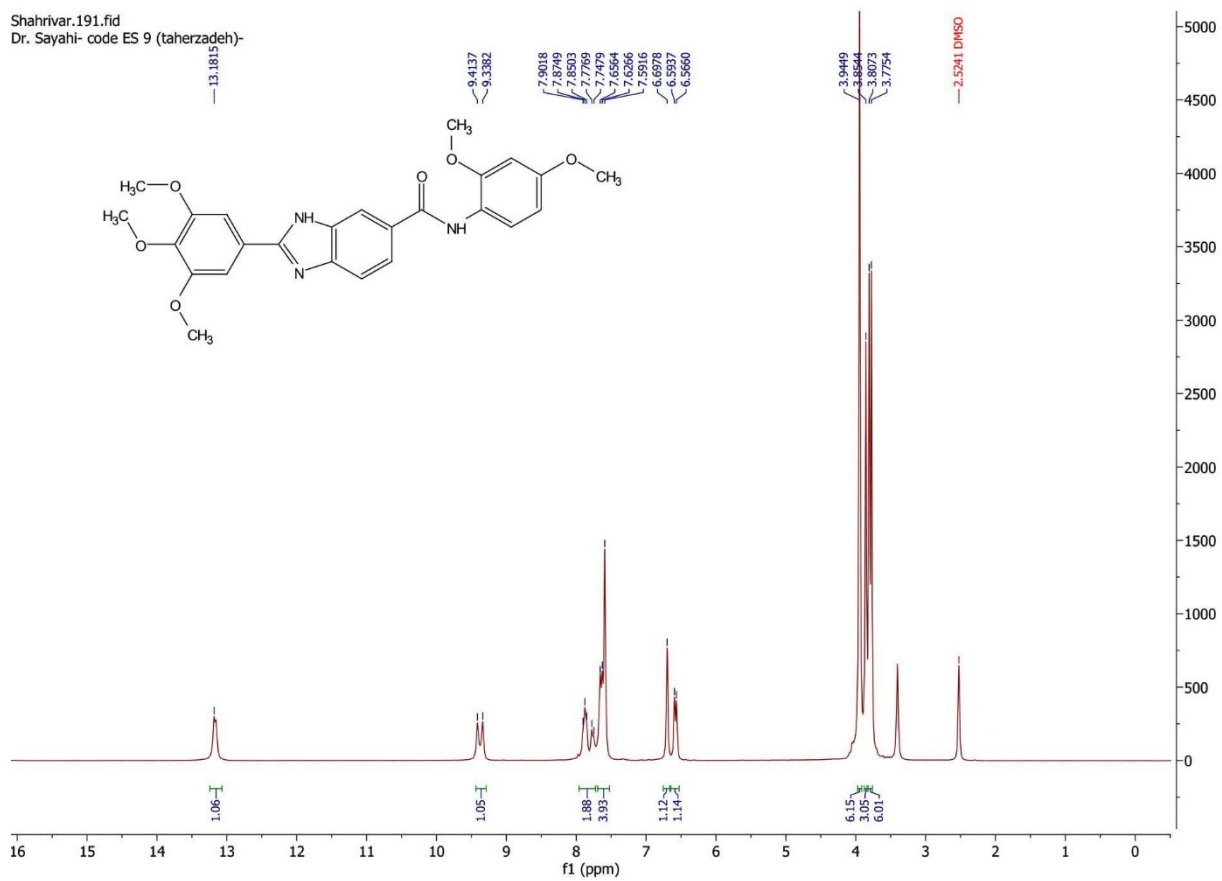

Figure S31. The  $^1\text{H}$ -NMR spectrum of 5o.

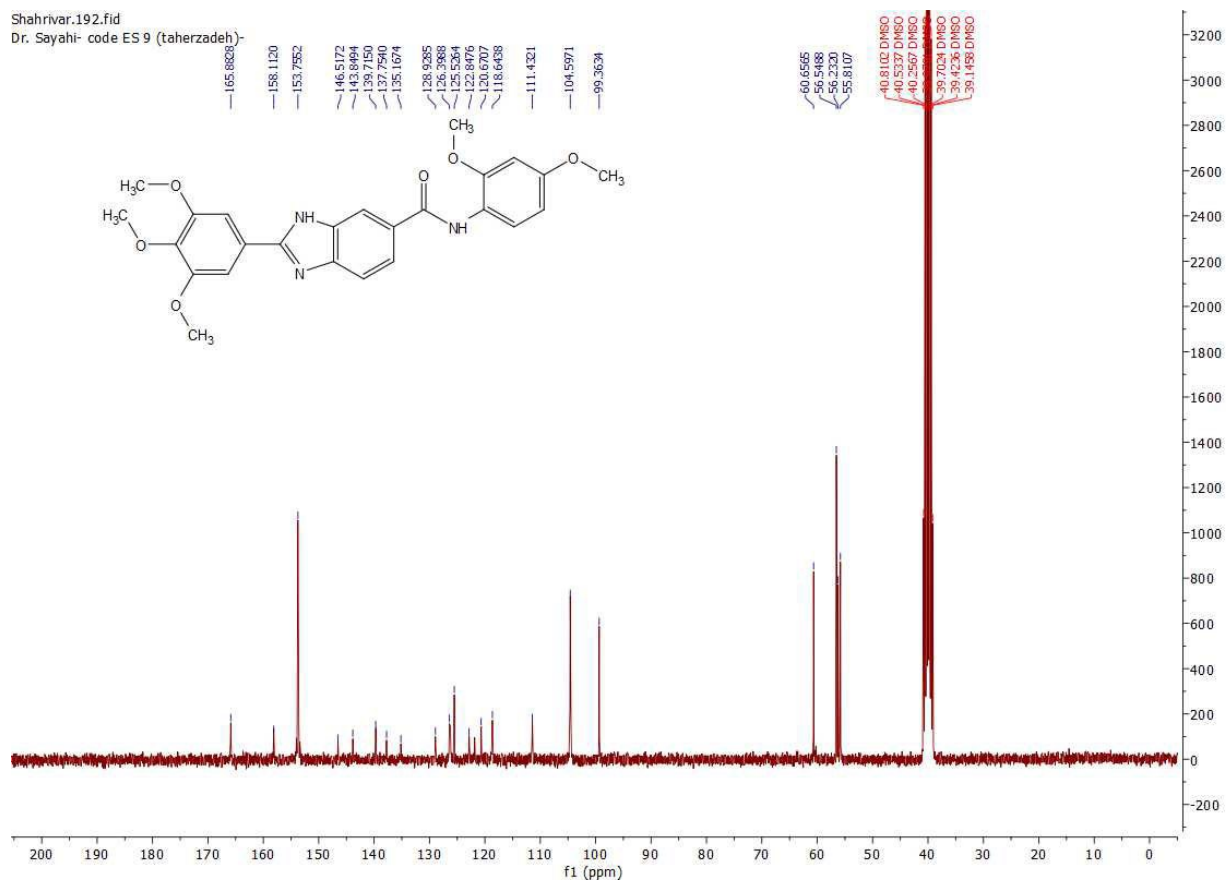

Figure S32. The  $^{13}\text{C}$ -NMR spectrum of 50.

Figure S33. Cytotoxicity of **5a-o**, doxorubicin, cisplatin, and etoposide against A549 cells.

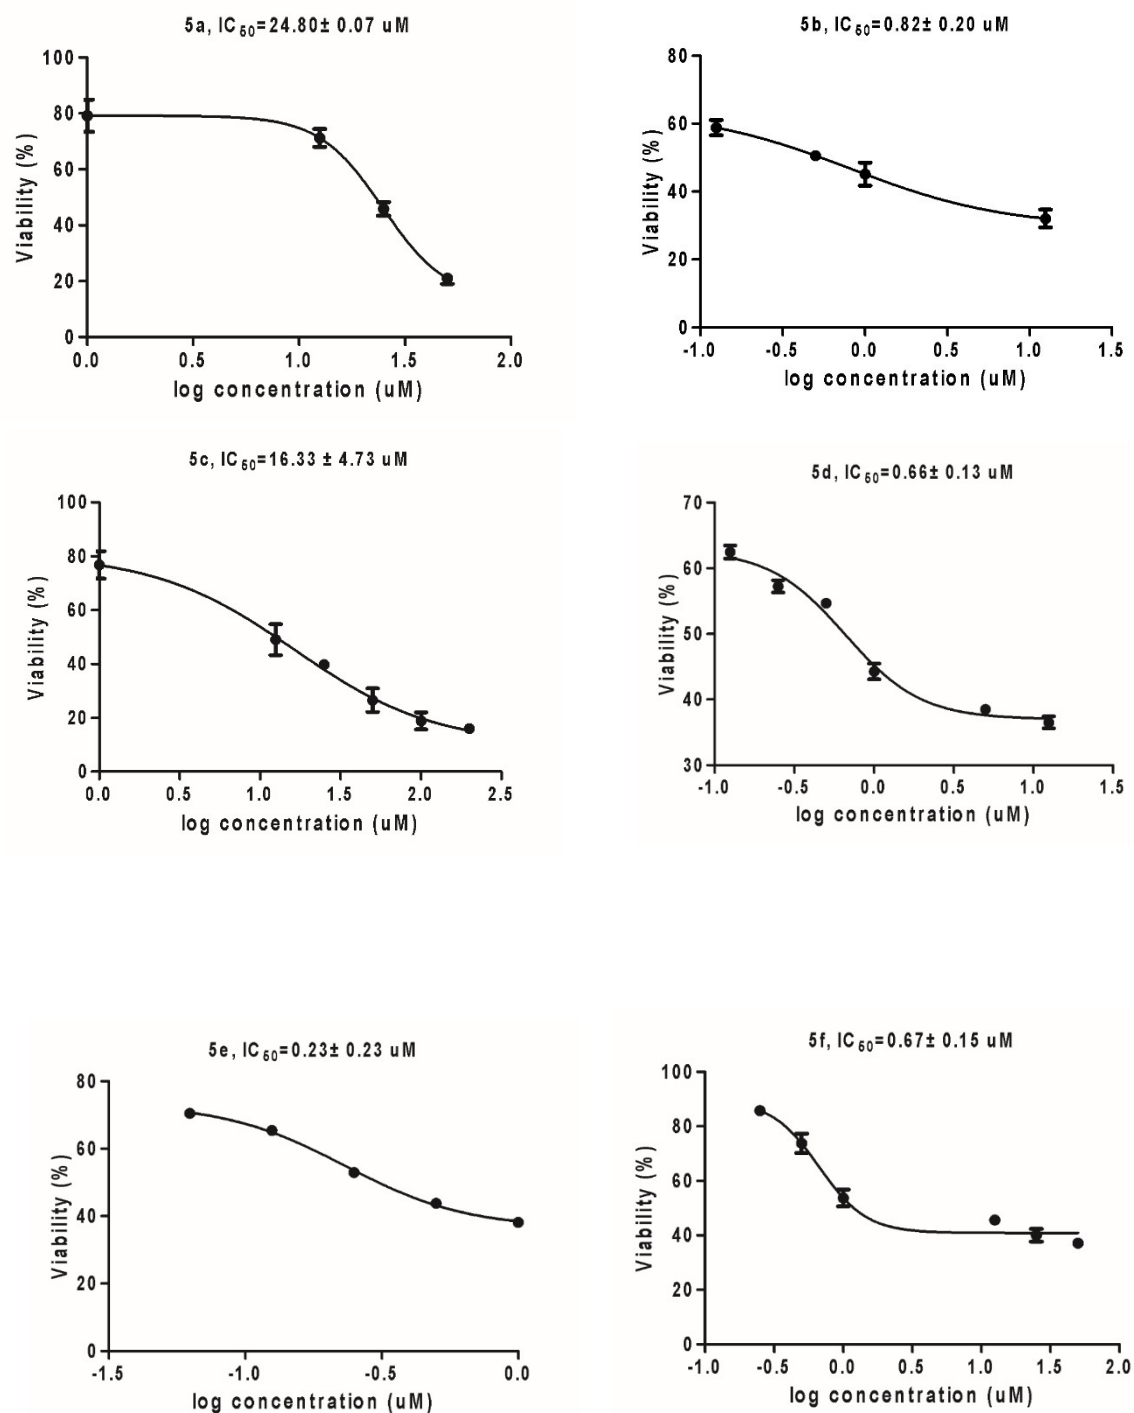

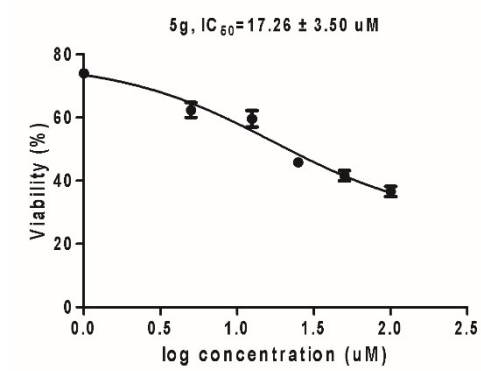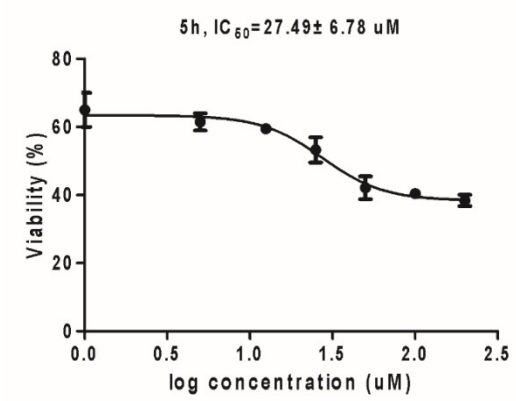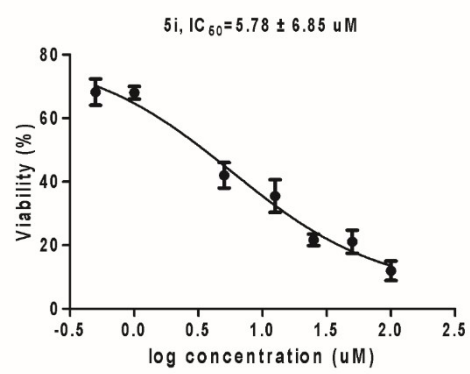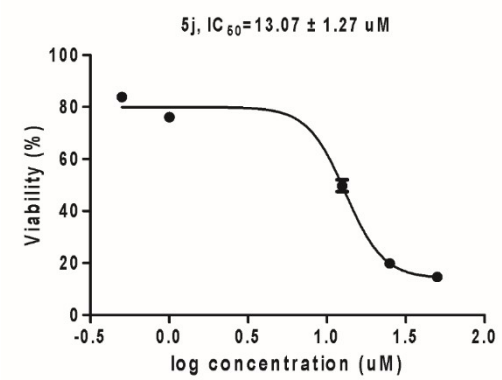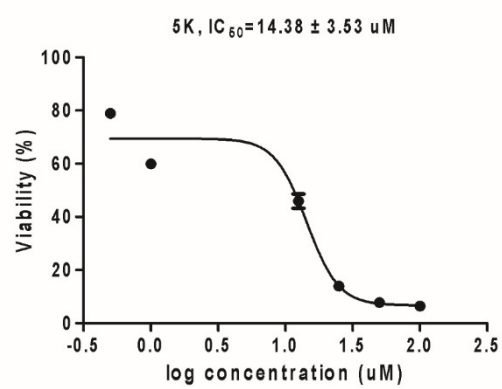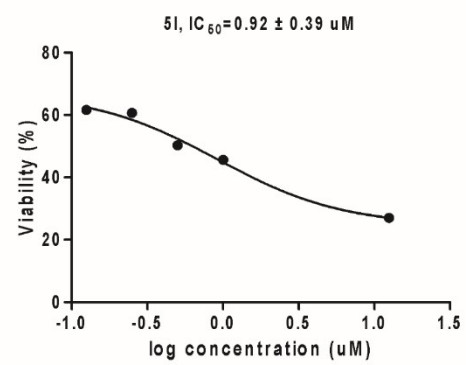

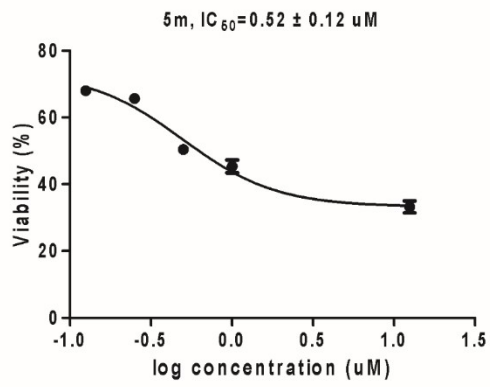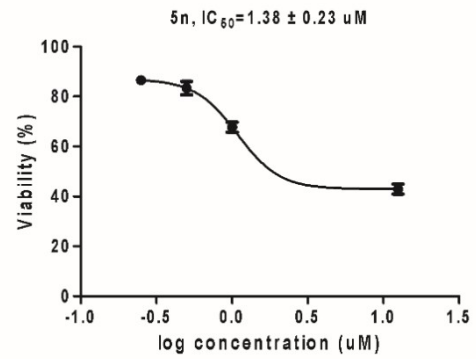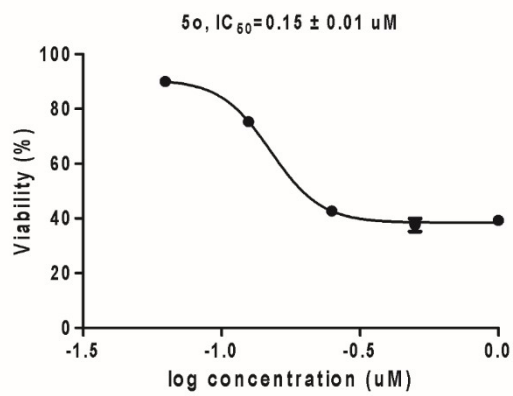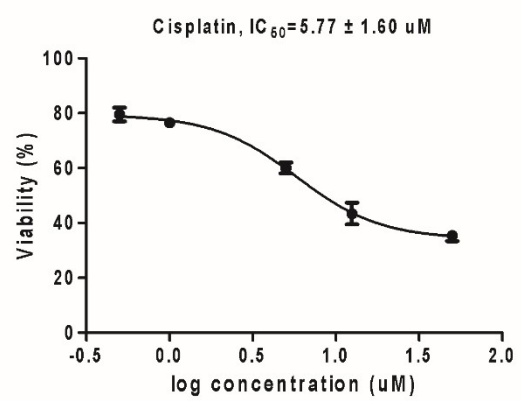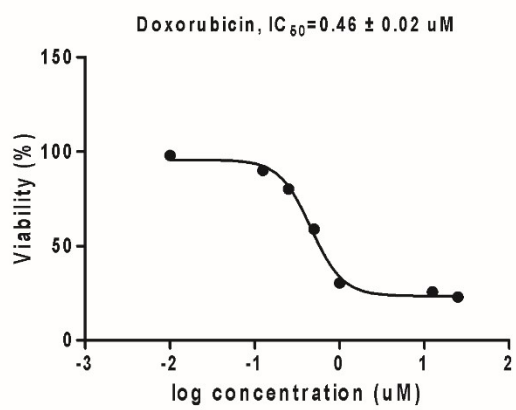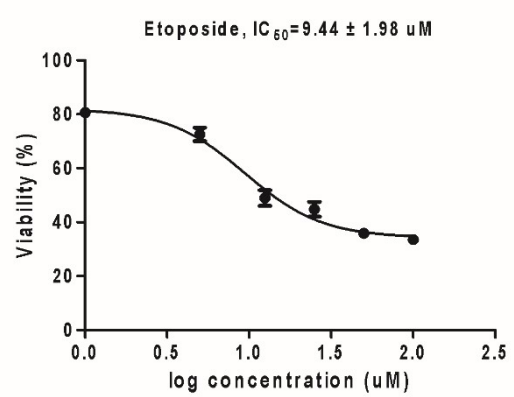

**Figure S34.** Cytotoxicity of **5a-o**, doxorubicin, cisplatin, and etoposide against SW480 cells.

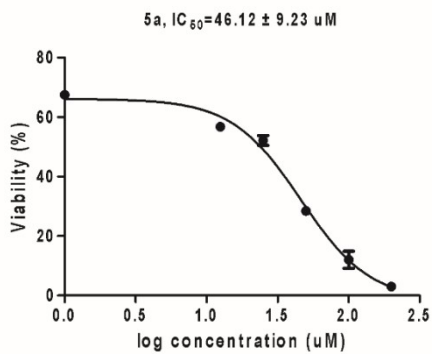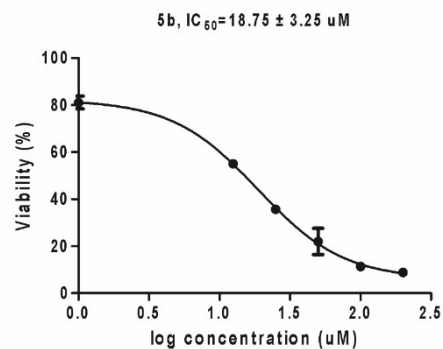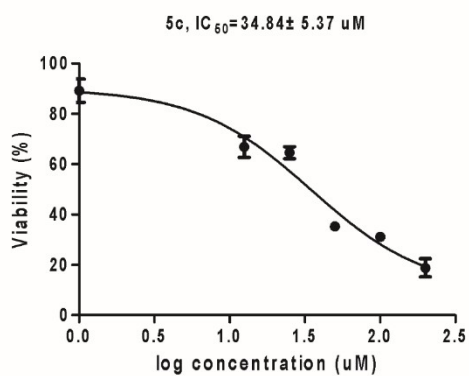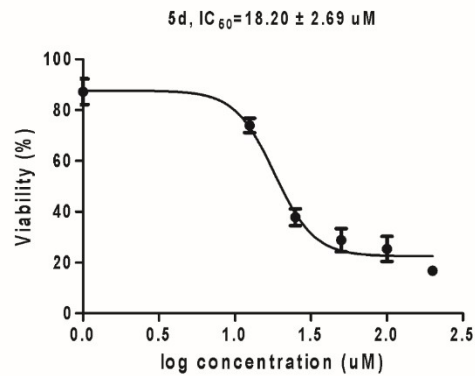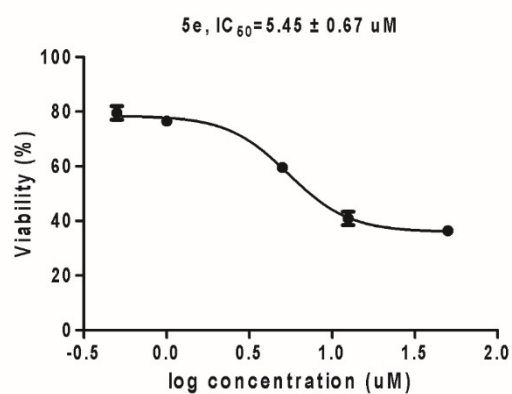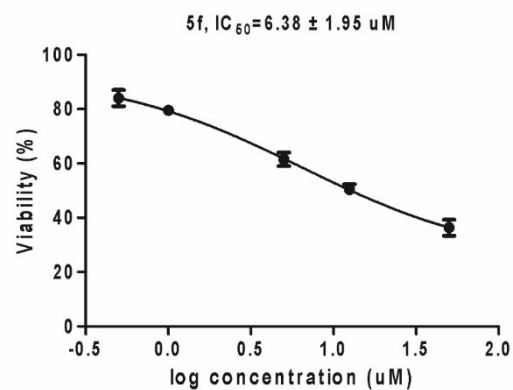

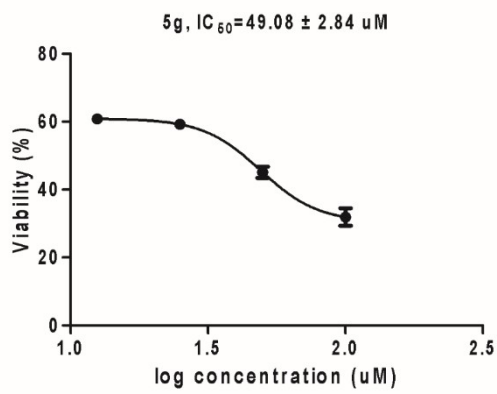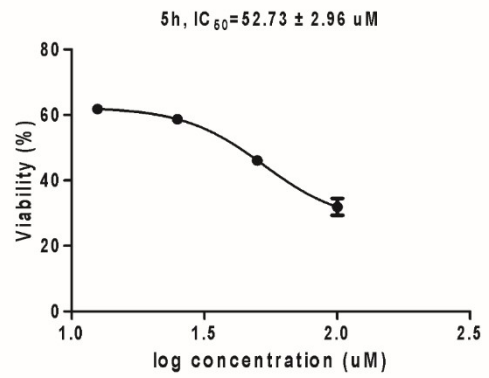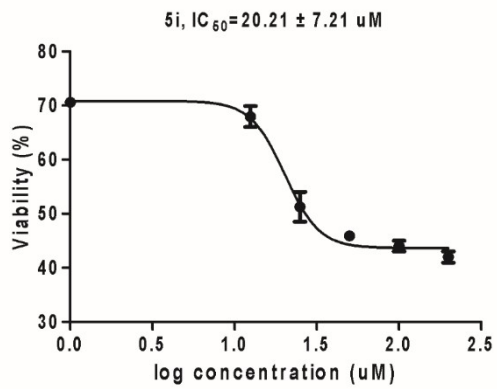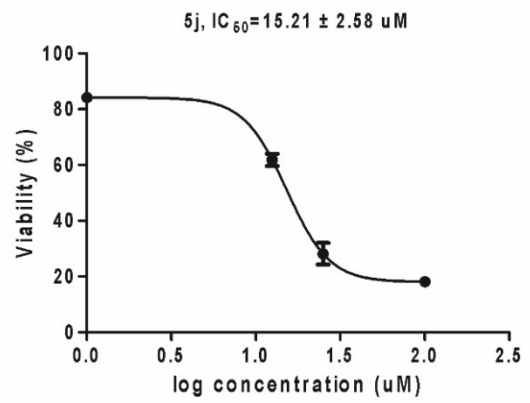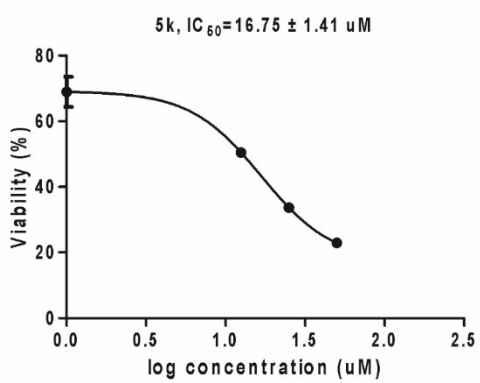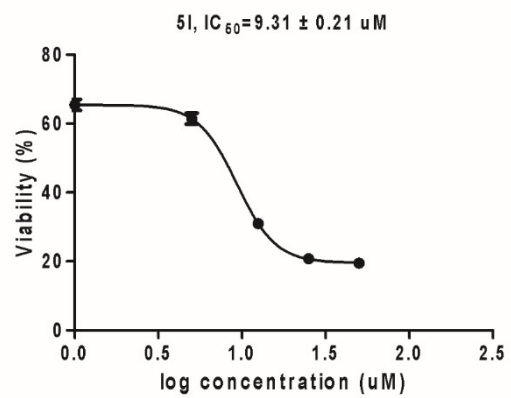

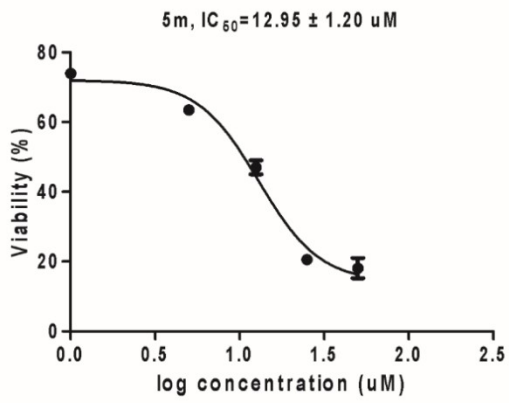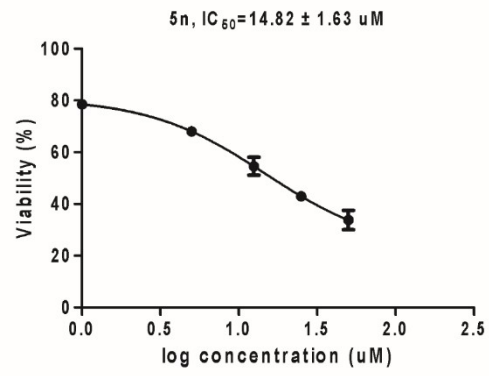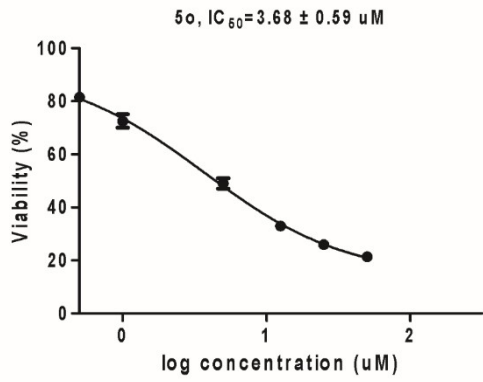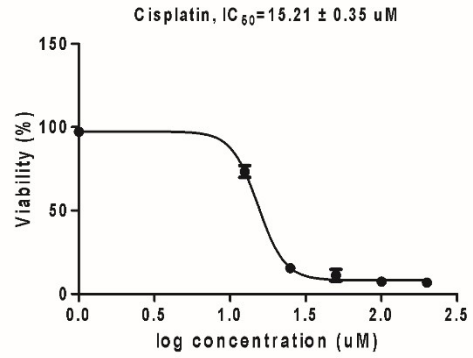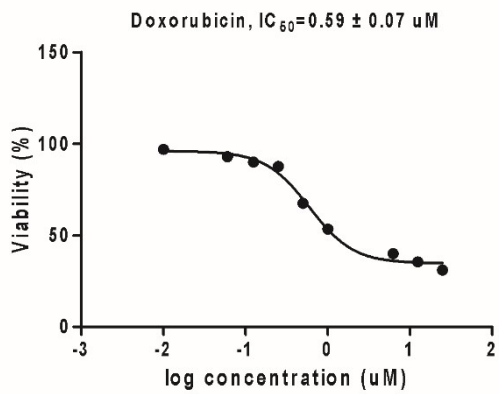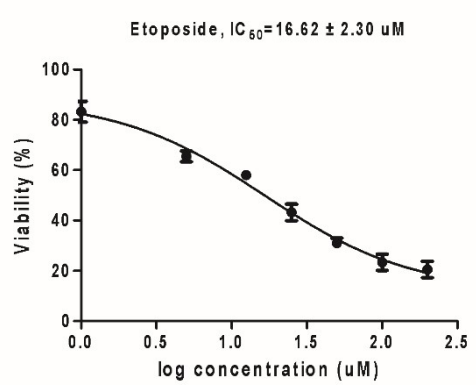



Figure S35. Cytotoxicity of 5e, 5m, 5o, doxorubicin, and cisplatin against MRC-5 cells.

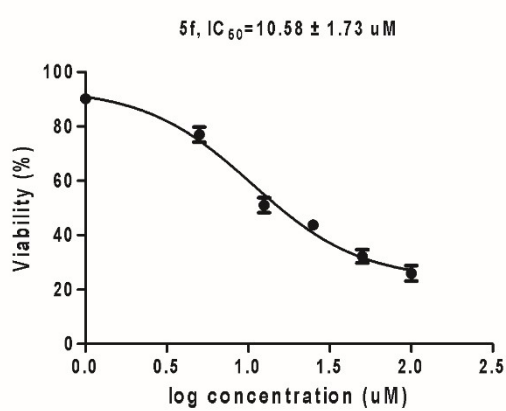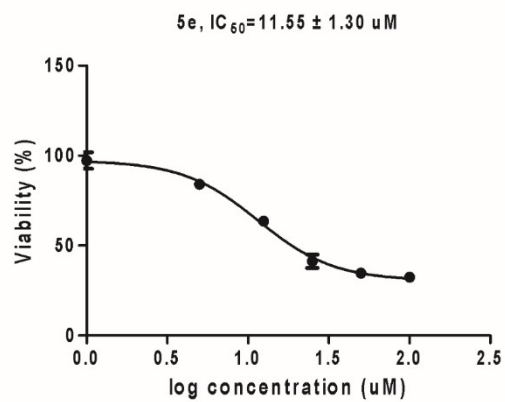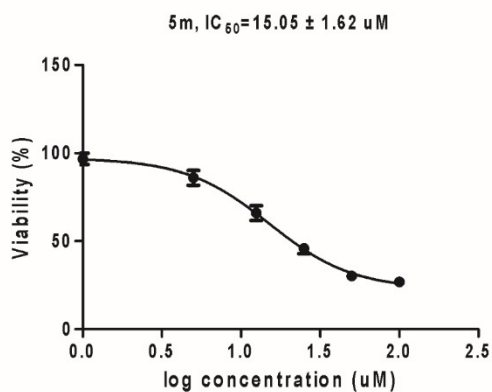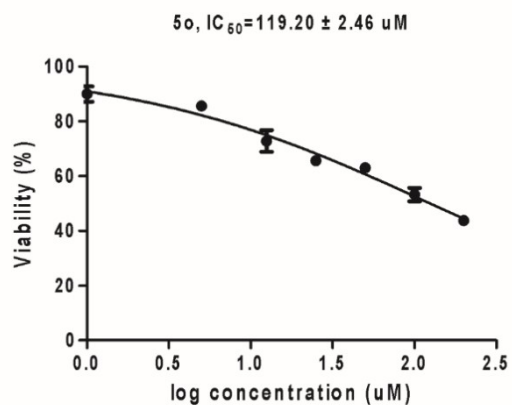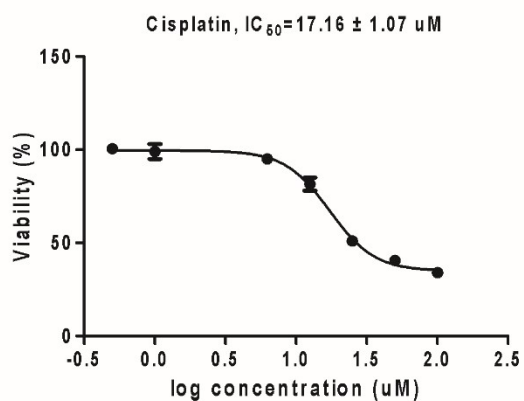



crystal structures of topoisomerases: a) Human Topo I- DNA (PDB ID: 1T8I), b) Human Topo II $\alpha$  ATPase-no DNA (PDB ID: 1ZXM), c) Human Topo II $\alpha$  ATPase-no DNA (PDB ID: 1ZXN), d) Human Topo II $\alpha$ - DNA (PDB ID: 5GWK), and e) Human Topo II $\beta$ -DNA (PDB ID: 4G0V).
